# Supplementary material for: An agonistic anti-signal regulatory protein α antibody for chronic inflammatory diseases
Source: PubMed Central journal article supplement — Cell Rep Med. 2023 Jul 24;4(8):101130. doi: 10.1016/j.xcrm.2023.101130 (PMC10439247; doi:10.1016/j.xcrm.2023.101130), 2023-07-24
Supplement: mmc1.pdf [file mmc1.pdf]

**Cell Reports Medicine, Volume 4**

**Supplemental information**

**An agonistic anti-signal regulatory protein  $\alpha$   
antibody for chronic inflammatory diseases**

**Markus M. Xie, Bingbing Dai, Jason A. Hackney, Tianhe Sun, Juan Zhang, Janet K. Jackman, Surinder Jeet, Ricardo A. Irizarry-Caro, Yongyao Fu, Yuxin Liang, Hannah Bender, Eliah R. Shamir, Mary E. Keir, Jack Bevers, Gerald Nakamura, Michael J. Townsend, David A. Fox, Alexis Scherl, Wyne P. Lee, Flavius Martin, Paul J. Godowski, Rajita Pappu, and Tangsheng Yi**

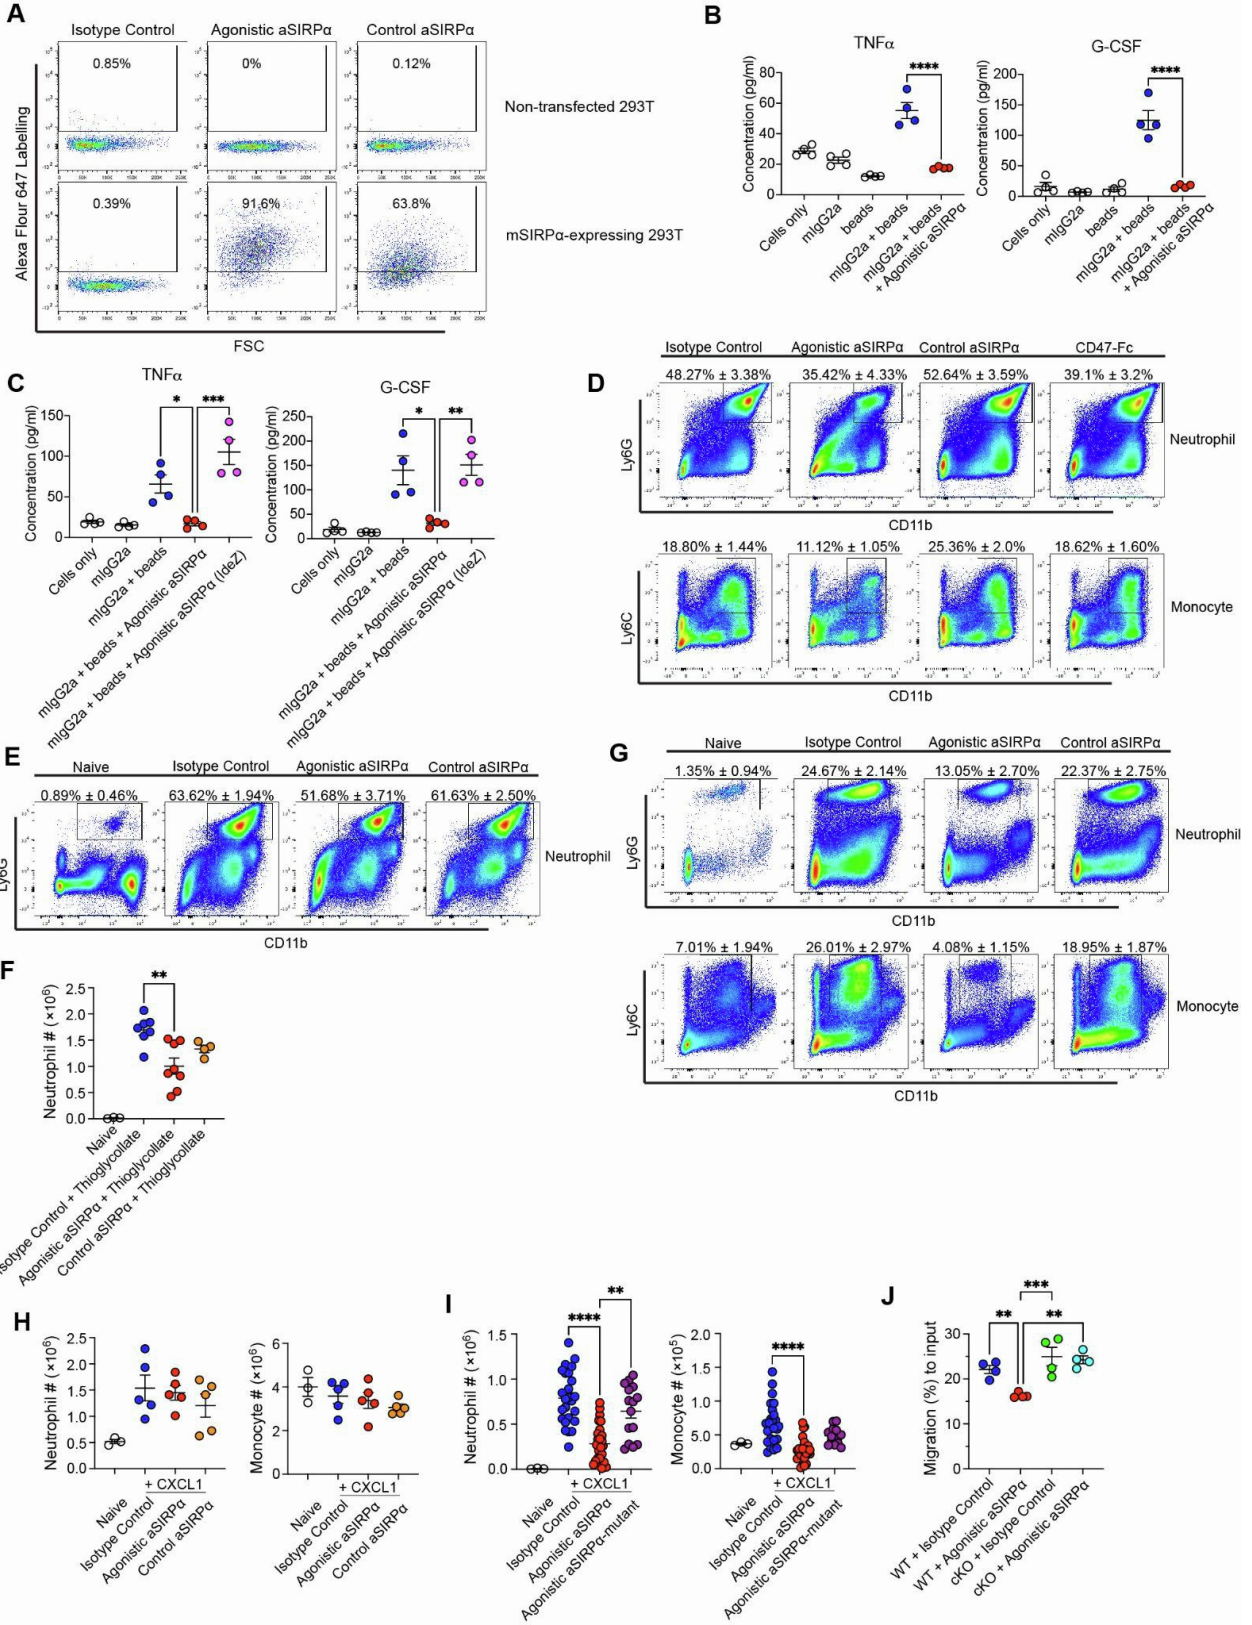

Figure S1 (related to Figure 2). Additional characterization of agonistic anti-Sirpα antibody and

**representative flow cytometric plots.**

(A) Representative dot plots of Alexa Fluor 647 labeled isotype control, the agonist anti-SIRP $\alpha$  and the control anti-SIRP $\alpha$  binding with SIRP $\alpha$ . The 293T cells were transfected with or without SIRP $\alpha$  before staining. (B, C) Production of inflammatory TNF $\alpha$  and G-CSF in the RAW 264.7 cell-mIgG2a-protein A beads immune complex system. Cells were treated with isotype control, Agonist aSIRP $\alpha$ , Control aSIRP $\alpha$ , or IdeZ protease pre-treated agonistic aSIRP $\alpha$  (C) at indicated concentration for one hour before protein A beads were added for another 24 hours' culture. Cell medium supernatants were collected for luminex assay for cytokine quantification. (D) Representative flow cytometric gating of neutrophils (Ly6G<sup>+</sup>GR1<sup>+</sup>) and monocytes (Ly6G<sup>-</sup>GR1<sup>+</sup>) from monoclonal antibody treated mice for Figure 2C. (E, F) Flow cytometric analysis of peritoneal neutrophils (gated Ly6G<sup>+</sup>CD11b<sup>+</sup>) from thioglycollate challenged mice. Representative dot plots (E) and average cell numbers (F) of neutrophils. (G) Representative dot plots of neutrophils (gated Ly6G<sup>+</sup>CD11b<sup>+</sup>) and monocytes (Ly6G<sup>-</sup>CD11b<sup>+</sup>) for Figure 2E. (H) Average neutrophil and monocyte cell numbers in spleen collected 4 hours after CXCL1 injection. (I) Average neutrophil and monocyte cell numbers in peritoneal cavity 4 hours after CXCL1 injection. Mice were treated with indicated antibodies 16hr before CXCL1 injection. (J) Quantification of transmigration assay with bone marrow neutrophils 4 hours after transmigration, migrating to 10 ng/ml CXCL1. Bone marrow cells were isolated from overnight Isotype control or agonistic aSIRP $\alpha$  treated WT or LysMCre<sup>+</sup>*Sirpa*<sup>L<sup>oxp</sup>/L<sup>oxp</sup></sup> mice. Data are from one representative experiment of two independent experiments with at least three biological replicates per group. Each symbol represents one mouse. \*P < 0.05, \*\*P < 0.01, \*\*\*P < 0.001 and \*\*\*\*P < 0.0001, by Ordinary One Way ANOVA with Tukey's multiple comparisons test.

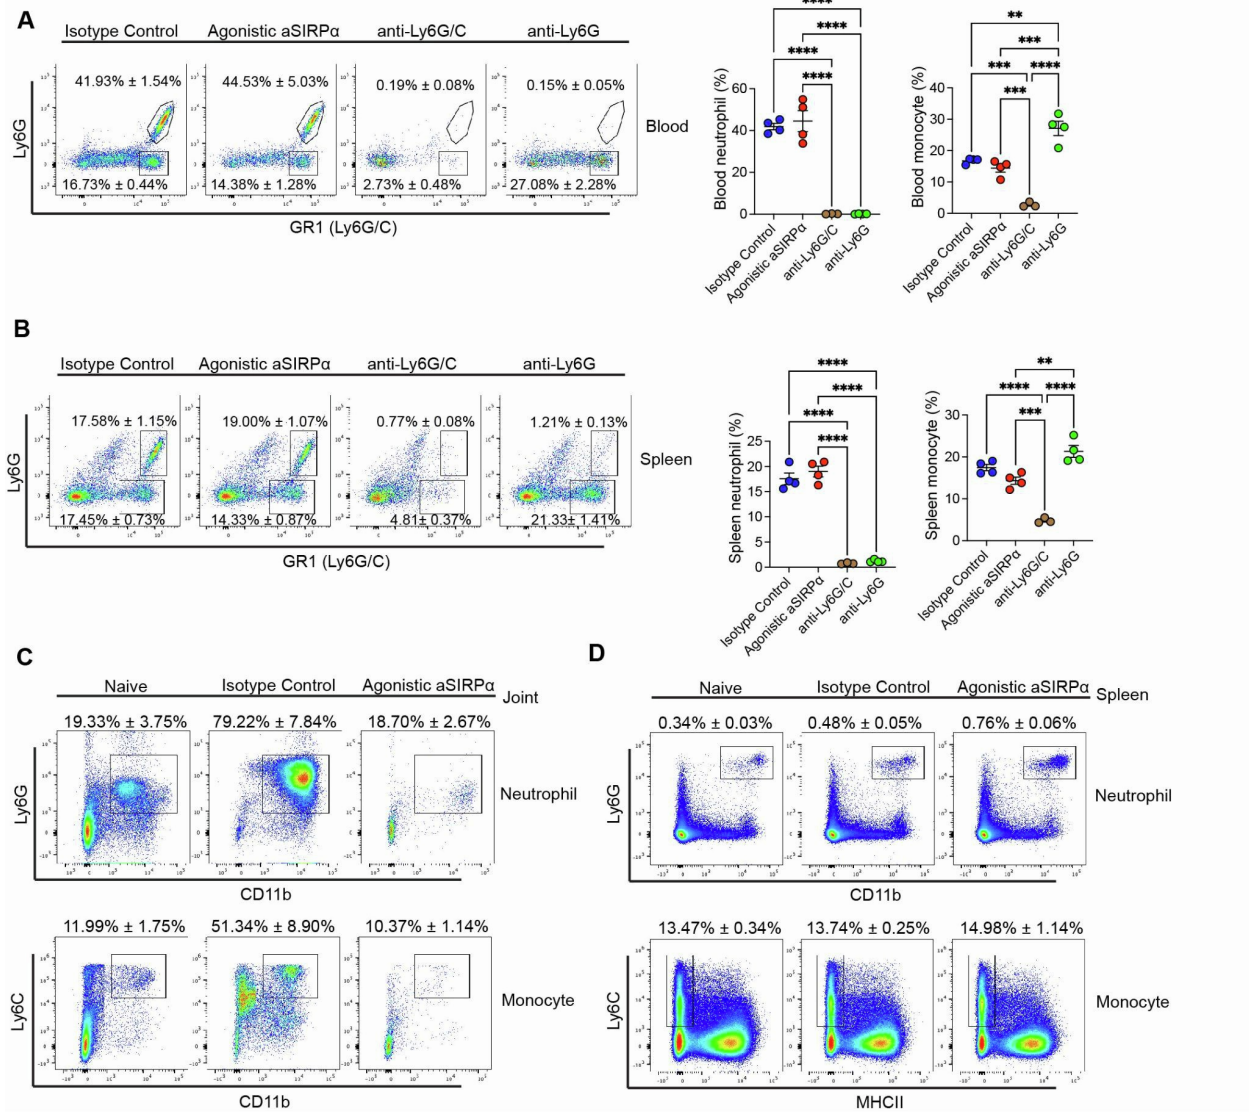

**Figure S2 (related to Figure 3) Representative flow cytometry plots of blood, spleen, and joint lymphocytes from KBxN arthritis mice.**

(A, B) Flow cytometric analysis of blood (A) and spleen (B) neutrophils (Ly6G<sup>+</sup>) (Ly6G/C is GR1) and monocytes (Ly6G<sup>+</sup>Ly6C<sup>+</sup>) from mice with indicated antibody treatment. Representative dot plots (left) and average cell percentages (right) of neutrophils and monocytes. (C) Representative dot plots of neutrophils (Ly6G<sup>+</sup>CD11b<sup>+</sup>) and monocytes (Ly6C<sup>+</sup>CD11b<sup>+</sup>) for Figure 4E. (D) Representative dot plots of spleen neutrophils (Ly6G<sup>+</sup>CD11b<sup>+</sup>) and monocytes (Ly6C<sup>+</sup>CD11b<sup>+</sup>MHCII<sup>-</sup>) for Figure 4F. Data for are from one representative experiment of two independent experiments with at least three technical replicates per group. Each symbol represents one mouse. \*P <

0.05, \*\*P < 0.01, \*\*\*P < 0.001 and \*\*\*\*P < 0.0001, by Ordinary One Way ANOVA with Tukey's multiple comparisons test.

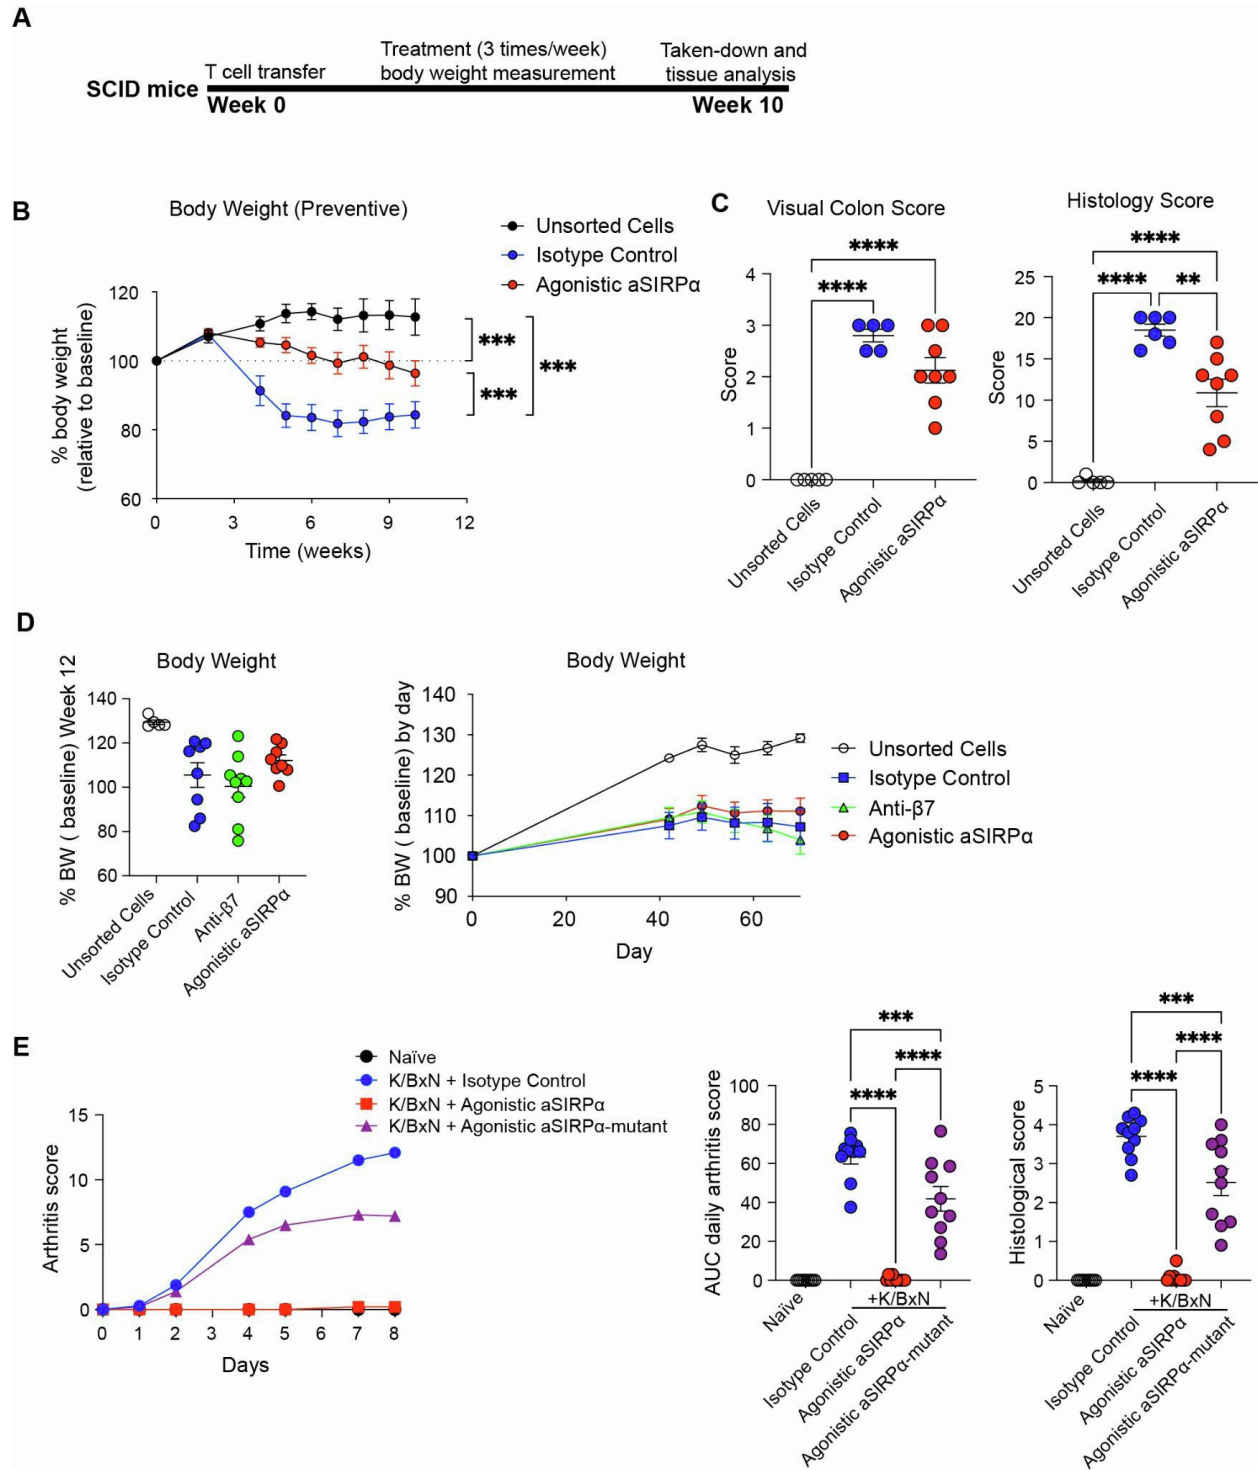

**Figure S3 (related to Figure 4 and discussion). Body weight from transfer colitis mice and reduced therapeutic efficacy in agonistic anti-Sirpα DANA mutant antibody.**

(A) Schema of the CD45RB<sup>high</sup>CD4<sup>+</sup> T cell transfer colitis preventive model. C.B17 SCID mice were transferred with unsorted or sorted CD45RB<sup>high</sup>CD4<sup>+</sup> T cells, and all mice were treated 3 times per week until the end of the

study. All mice were euthanized by Week 10. **(B, C)** Percentage of body weight to baseline of Week 0 in the CD45RB<sup>high</sup>CD4<sup>+</sup> T cell transfer colitis model. Visual colon scores and histological scores of colons. **(D)** In the therapeutic model of Figure 4A, mouse body weight was measured at the beginning as baseline and again measured at Week 12 at the end of the experiment. **(E)** Clinical arthritis scores and paw/joint histological scores of mice received various treatments and K/BxN serum transfer. Anti-Sirp $\alpha$  DANA mutant antibody carries amino acid mutations to abrogate Fc binding to Fc receptors. Data for are from one representative experiment of two independent experiments with at least three technical replicates per group. Each symbol represents one mouse. \*P < 0.05, \*\*P < 0.01, \*\*\*P < 0.001 and \*\*\*\*P < 0.0001, by Ordinary One Way ANOVA with Tukey's multiple comparisons test.

**Table S1 (related to Figure 1). Elevated SIRPA and neutrophil/monocyte associated genes in IBD biopsies.**

| Symbol | Crohn's Disease inflamed v uninfamed |            | Ulcerative Colitis inflamed v uninfamed |            |
|--------|--------------------------------------|------------|-----------------------------------------|------------|
|        | Log Fold Change                      | FDR        | Log Fold Change                         | FDR        |
| SIRPA  | 0.92525523                           | 1.93E-05   | 0.64693961                              | 8.82E-05   |
| CSF3   | 0.69977411                           | 0.00018332 | 0.6569778                               | 0.00089511 |
| CXCL8  | 1.50874913                           | 3.12E-06   | 1.53507407                              | 4.49E-05   |
| S100A8 | 2.46943274                           | 3.20E-06   | 2.67787325                              | 3.75E-05   |
| S100A9 | 1.45178803                           | 6.94E-06   | 1.63951405                              | 6.63E-05   |
| VNN2   | 0.96334373                           | 0.00204402 | 0.99420002                              | 0.00298004 |
| NCF2   | 1.13740821                           | 3.80E-05   | 0.97764397                              | 8.50E-05   |
| FCGR2A | 0.91239283                           | 9.15E-05   | 0.61994322                              | 0.00039825 |

Statistical analysis of transcriptional data of neutrophil/monocyte associated gene expression in inflamed and uninfamed UC/CD colonic biopsies. FDR is the false discovery rate. Mean fold change is represented in log format.



**Table S2 (related to Figure 1). Elevated SIRPA and neutrophil/monocyte associated genes in baseline colonic biopsies of patients who failed with Vedolizumab or Infliximab.**

| Gene   | Biologic Non-responder vs Responder at Baseline |         |       | Vedolizumab Non-responder vs Responder at Baseline |         |       | Infliximab Non-responder vs Responder at Baseline |         |       |
|--------|-------------------------------------------------|---------|-------|----------------------------------------------------|---------|-------|---------------------------------------------------|---------|-------|
|        | Log Fold Change                                 | P Value | FDR   | Log Fold Change                                    | P Value | FDR   | Log Fold Change                                   | P Value | FDR   |
| SIRPA  | 0.333                                           | 0.020   | 0.288 | 0.334                                              | 0.056   | 0.333 | 0.020                                             | 0.288   | 0.334 |
| S100A8 | 1.225                                           | 0.006   | 0.288 | 0.969                                              | 0.081   | 1.225 | 0.006                                             | 0.288   | 0.969 |
| S100A9 | 0.830                                           | 0.008   | 0.288 | 0.668                                              | 0.090   | 0.830 | 0.008                                             | 0.288   | 0.668 |
| VNN2   | 0.868                                           | 0.009   | 0.288 | 1.014                                              | 0.014   | 0.868 | 0.009                                             | 0.288   | 1.014 |
| CXCL8  | 1.044                                           | 0.006   | 0.288 | 1.006                                              | 0.053   | 1.044 | 0.006                                             | 0.288   | 1.006 |
| FCGR2A | 0.769                                           | 0.018   | 0.288 | 0.940                                              | 0.032   | 0.769 | 0.018                                             | 0.288   | 0.940 |
| NCF2   | 0.663                                           | 0.016   | 0.288 | 0.684                                              | 0.069   | 0.663 | 0.016                                             | 0.288   | 0.684 |
| CSF3   | 0.463                                           | 0.024   | 0.288 | 0.491                                              | 0.068   | 0.463 | 0.024                                             | 0.288   | 0.491 |
| NLRP3  | 0.603                                           | 0.004   | 0.288 | 0.663                                              | 0.045   | 0.603 | 0.004                                             | 0.288   | 0.663 |

Statistical analysis of transcriptional data of neutrophil/monocyte associated gene expression in baseline colonic biopsies of patients who responded or failed with Vedolizumab and Infliximab. FDR is the false discovery rate. Mean fold change is represented in log format.

**Table S3 (related to Figure 3). Agonistic anti-SIRP $\alpha$  treatment reduces inflammatory genes in joint tissues.**

| Gene   | Isotype Control vs Naïve Mice |       | Agonistic aSIRP $\alpha$ vs Isotype Control |       |
|--------|-------------------------------|-------|---------------------------------------------|-------|
|        | Log Fold Change               | FDR   | Log Fold Change                             | FDR   |
| Il1b   | 6.890                         | 0.013 | -5.164                                      | 0.054 |
| Il6    | 5.120                         | 0.009 | -4.052                                      | 0.032 |
| Ccl7   | 4.946                         | 0.007 | -2.810                                      | 0.011 |
| Ccl8   | 4.018                         | 0.012 | -3.432                                      | 0.008 |
| Ccl12  | NA                            | NA    | -2.082                                      | 0.048 |
| Cxcl1  | 4.860                         | 0.007 | -2.961                                      | 0.007 |
| Cxcl2  | 3.692                         | 0.005 | -3.292                                      | 0.018 |
| Cxcl3  | NA                            | NA    | -2.475                                      | 0.113 |
| Csf3   | NA                            | NA    | NA                                          | NA    |
| Csf3r  | 3.516                         | 0.012 | -2.201                                      | 0.035 |
| Fcgr2b | 2.079                         | 0.004 | -1.194                                      | 0.017 |
| Clec4d | 3.819                         | 0.002 | -3.265                                      | 0.005 |
| Clec4e | 3.780                         | 0.009 | -2.817                                      | 0.020 |
| Cd68   | 6.890                         | 0.013 | -5.164                                      | 0.054 |
| Cd80   | 5.120                         | 0.009 | -4.052                                      | 0.032 |
| Ncf2   | 4.946                         | 0.007 | -2.810                                      | 0.011 |
| Sirpa  | 4.018                         | 0.012 | -3.432                                      | 0.008 |

Statistical analysis of differential expression of genes related to myeloid cells and genes of cytokines and chemokines in naïve, Isotype control and Agonistic aSIRP $\alpha$  treated mice on Day7 after K/BxN serum transfer. FDR is the false discovery rate. Mean fold change is represented in log format.
