# Supplementary material for: An agonistic anti-signal regulatory protein α antibody for chronic inflammatory diseases
Source: PubMed Central journal article supplement — Cell Rep Med. 2023 Jul 24;4(8):101130. doi: 10.1016/j.xcrm.2023.101130 (PMC10439247; doi:10.1016/j.xcrm.2023.101130), 2023-07-24
Supplement: mmc2.pdf [file mmc2.pdf]

# An agonistic anti-signal regulatory protein $\alpha$ antibody for chronic inflammatory diseases

## Graphical abstract

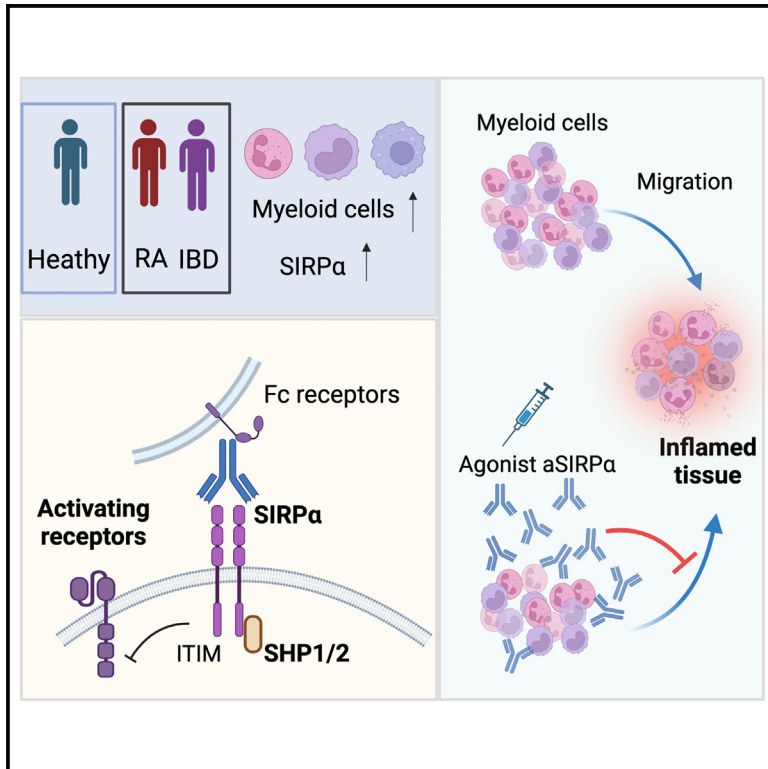

## Authors

Markus M. Xie, Bingbing Dai, Jason A. Hackney, ..., Paul J. Godowski, Rajita Pappu, Tangsheng Yi

## Correspondence

godowski89@gmail.com (P.J.G.), Pappu.Rajita@gene.com (R.P.), tangshengyi@gmail.com (T.Y.)

## In brief

Xie et al. report an agonistic anti-SIRP $\alpha$  antibody that reduces neutrophils, monocytes, and cytokines in inflamed tissues. Anti-SIRP $\alpha$  agonistic antibody treatment inhibits neutrophil and monocyte migration and ameliorates tissue injury in experimental arthritis and colitis.

## Highlights

- Increased SIRP $\alpha$ <sup>+</sup> monocytes and neutrophils in inflamed biopsies of RA and IBD patients
- Agonistic SIRP $\alpha$  antibody inhibits neutrophils and monocyte migration to inflamed tissues
- Agonistic SIRP $\alpha$  treatment ameliorates experimental arthritis and colitis

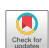

## Report

# An agonistic anti-signal regulatory protein $\alpha$ antibody for chronic inflammatory diseases

Markus M. Xie,<sup>1</sup> Bingbing Dai,<sup>1</sup> Jason A. Hackney,<sup>2</sup> Tianhe Sun,<sup>1</sup> Juan Zhang,<sup>3</sup> Janet K. Jackman,<sup>1</sup> Surinder Jeet,<sup>3</sup> Ricardo A. Irizarry-Caro,<sup>1,4</sup> Yongyao Fu,<sup>5</sup> Yuxin Liang,<sup>6</sup> Hannah Bender,<sup>7</sup> Eliah R. Shamir,<sup>7</sup> Mary E. Keir,<sup>4</sup> Jack Bevers,<sup>8</sup> Gerald Nakamura,<sup>8</sup> Michael J. Townsend,<sup>4</sup> David A. Fox,<sup>9</sup> Alexis Scherl,<sup>7</sup> Wyne P. Lee,<sup>3</sup> Flavius Martin,<sup>1</sup> Paul J. Godowski,<sup>1,\*</sup> Rajita Pappu,<sup>1,\*</sup> and Tangsheng Yi<sup>1,10,11,\*</sup>

<sup>1</sup>Department of Immunology Discovery, Genentech, Inc., South San Francisco, CA, USA

<sup>2</sup>Department of OMNI Biomarker Development, Genentech, Inc., South San Francisco, CA, USA

<sup>3</sup>Department of Translational Immunology, Genentech, Inc., South San Francisco, CA, USA

<sup>4</sup>Department of Human Pathobiology and OMNI Reverse Translation, Genentech, Inc., South San Francisco, CA, USA

<sup>5</sup>Department of Discovery Oncology, Genentech, Inc., South San Francisco, CA, USA

<sup>6</sup>Department of Microchemistry, Proteomics, and Lipidomics and Next Generation Sequencing, Genentech, Inc., South San Francisco, CA, USA

<sup>7</sup>Department of Pathology, Genentech, Inc., South San Francisco, CA, USA

<sup>8</sup>Department of Antibody Engineering, Genentech, Inc., South San Francisco, CA, USA

<sup>9</sup>Division of Rheumatology, Clinical Autoimmunity Center of Excellence, University of Michigan Medical School, Ann Arbor, MI, USA

<sup>10</sup>Present address: Department of Inflammation Biology, Gilead Sciences, Foster City, CA, USA

<sup>11</sup>Lead contact

\*Correspondence: [godowski89@gmail.com](mailto:godowski89@gmail.com) (P.J.G.), [Pappu.Rajita@gene.com](mailto:Pappu.Rajita@gene.com) (R.P.), [tangshengyi@gmail.com](mailto:tangshengyi@gmail.com) (T.Y.)

<https://doi.org/10.1016/j.xcrm.2023.101130>

## SUMMARY

Signal regulatory protein (SIRP $\alpha$ ) is an immune inhibitory receptor expressed by myeloid cells to inhibit immune cell phagocytosis, migration, and activation. Despite the progress of SIRP $\alpha$  and CD47 antagonist antibodies to promote anti-cancer immunity, it is not yet known whether SIRP $\alpha$  receptor agonism could restrain excessive autoimmune tissue inflammation. Here, we report that neutrophil- and monocyte-associated genes including *SIRPA* are increased in inflamed tissue biopsies from patients with rheumatoid arthritis and inflammatory bowel diseases, and elevated *SIRPA* is associated with treatment-refractory ulcerative colitis. We next identify an agonistic anti-SIRP $\alpha$  antibody that exhibits potent anti-inflammatory effects in reducing neutrophil and monocyte chemotaxis and tissue infiltration. In preclinical models of arthritis and colitis, anti-SIRP $\alpha$  agonistic antibody ameliorates autoimmune joint inflammation and inflammatory colitis by reducing neutrophils and monocytes in tissues. Our work provides a proof of concept for SIRP $\alpha$  receptor agonism for suppressing excessive innate immune activation and chronic inflammatory disease treatment.

## INTRODUCTION

Human immune responses evolved through an exquisitely regulated process integrating activating and inhibitory receptors on the immune cell surface. The best examples for activating and inhibitory immune receptor families are immunoreceptor-tyrosine-based activation motif (ITAM)-containing receptors and immunoreceptor-tyrosine-based inhibitory motif (ITIM)-containing receptors.<sup>1,2</sup> Complex interactions and fully integrated signal inputs from ITAM- or ITIM-containing receptors regulate the quality and magnitude of immune responses and are widely targeted for immune-based therapies.<sup>1</sup> Blockade of ITIM-containing inhibitory receptors, such as programmed death 1 (PD1) and lymphocyte activation gene 3 (LAG3), to amplify activating signals and promote anti-tumor immunity, has been clinically beneficial, but such activation is often accompanied by a hyper-immune response and autoimmunity, a common side effect of checkpoint blockade.<sup>3,4</sup> In the context of immune suppression,

blockade of activating receptors remains challenging due to the redundancy between this class of immune receptors. Successful application of inhibitory receptor agonism remains limited for immune regulation.<sup>5</sup>

SIRP $\alpha$  is an immunoinhibitory receptor primarily expressed by myeloid lineage of immune cells, including neutrophils, monocytes, macrophages, and dendritic cells (DCs).<sup>6</sup> CD47 (also known as integrin-associated protein, IPA) is the only known endogenous ligand for SIRP $\alpha$ , and SIRP $\alpha$ -CD47 interaction leads to recruitment of protein-tyrosine phosphatases (SHP1 and SHP2) that counteract activating signals through dephosphorylation of its substrates in proximity, thereby transducing inhibitory signals that restrict immune cell function.<sup>6,7</sup> Temporal blockade of CD47 and/or SIRP $\alpha$  leads to integrin-mediated DC activation,<sup>8</sup> macrophage phagocytosis,<sup>9,10</sup> and increased immune cell migrations.<sup>11,12</sup> Furthermore, anti-CD47 and anti-SIRP $\alpha$  antibodies are under clinical investigation as a cancer immunotherapy for blood and solid tumor types.<sup>13,14</sup> Despite

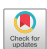

the success of CD47 and SIRP $\alpha$  blockades in cancer immunity, agonism of SIRP $\alpha$  to control inflammation has not yet been achieved.

Here, we reported that SIRP $\alpha$  was elevated in inflamed human tissues, and antibody-mediated agonism inhibited neutrophil and monocyte tissue infiltration. In preclinical animal models of arthritis and colitis, the agonistic anti-SIRP $\alpha$  ameliorated diseases through reduction of injurious neutrophil and monocyte tissue infiltration. Our work provides a proof-of-concept study demonstrating the therapeutic benefit of agonizing ITIM-containing inhibitory receptors for innate immune suppression in inflammatory diseases.

## RESULTS

### Elevated SIRP $\alpha$ <sup>+</sup> myeloid cells in inflammatory tissues and associated with treatment non-responsiveness

We first investigated *SIRPA* expression in synovial biopsies from healthy, osteoarthritis (OA), and rheumatoid arthritis (RA) patients and found *SIRPA* was significantly elevated in RA patients as compared with healthy and OA patients (Figure 1A). In addition, *SIRPA* transcripts were also upregulated in inflamed colon tissues of ulcerative colitis (UC) and Crohn disease (CD) patients (Figure 1B). Enhanced *SIRPA* expression in inflamed UC/CD colonic biopsies was correlated with other neutrophil and inflammatory monocyte-associated genes (e.g., *S100A8*, *S100A9*, *FCGR2A*, *VNN2*, *NCF2*) (Figure 1C and Table S1). Consistent with prior publications revealing elevated neutrophil and monocyte gene signatures are associated with inflammatory bowel disease (IBD) patients with adalimumab and vedolizumab non-responsiveness,<sup>15,16</sup> *SIRPA*, as well as other neutrophil- and monocyte-associated genes, were most highly increased in baseline colonic biopsies of patients who failed with anti-tumor necrosis factor (TNF) (infliximab) or anti- $\alpha$ 4 $\beta$ 7 (vedolizumab) inhibitory antibody (Figure 1D and Table S2). Highly correlated upregulation of *SIRPA* and other neutrophil/monocyte-associated genes in inflamed tissues suggests an increased frequency SIRP $\alpha$ <sup>+</sup> neutrophils/monocytes rather than a cellular increase in SIRP $\alpha$  receptor expression. To confirm this hypothesis, we performed anti-SIRP $\alpha$  immunohistochemistry staining and found increased frequency of SIRP $\alpha$ <sup>+</sup> mononuclear cells in the RA synovium and CD-derived inflamed colon biopsies (Figure 1E). Taken together, we observed increased SIRP $\alpha$ <sup>+</sup> neutrophils/monocytes in inflamed biopsies of RA and IBD patients.

### Agonistic anti-SIRP $\alpha$ antibody inhibits neutrophil and inflammatory monocyte tissue infiltration

Given the abundant SIRP $\alpha$ <sup>+</sup> neutrophils/monocytes in inflamed tissues, we hypothesized that the SIRP $\alpha$  agonistic antibodies could suppress innate immune activation during inflammation through transducing inhibitory signals. Accordingly, we immunized hamsters with a murine recombinant SIRP $\alpha$  extracellular domain protein and identified a novel SIRP $\alpha$  activating antibody clone (termed agonistic anti-SIRP $\alpha$ ). Agonistic anti-SIRP $\alpha$  recognized mouse SIRP $\alpha$  in the cell surface (Figure S1A) and induced rapid SIRP $\alpha$  receptor phosphorylation (Figure 2A). To validate the activating function of the agonistic anti-SIRP $\alpha$  antibody, we added murine immunoglobulin (Ig)G2a to the mouse macrophage

cell line RAW 264.7 cells with or without anti-SIRP $\alpha$ , and subsequently added protein A beads to crosslink the IgG2a and the agonistic anti-SIRP $\alpha$  immune complex. Using this system, we found that the agonistic SIRP $\alpha$  antibody potently inhibited immune complex induced RAW 264.7 cell secretion of TNF $\alpha$  and granulocyte colony-stimulating factor (G-CSF) (Figure S1B). CD47-Fc fusion protein, which mimics endogenous SIRP $\alpha$  activation, also suppressed TNF $\alpha$  and G-CSF secretion, albeit only at the high concentrations (1  $\mu$ g/mL) and was significantly less potent at lower protein concentrations (10–100 ng/mL) as compared with the agonistic anti-SIRP $\alpha$  antibody (Figure 2B). Suboptimal agonistic activity of CD47-Fc likely resulted from 200-fold lower affinity of CD47-Fc (2  $\mu$ M binding Kd for SIRP $\alpha$ /CD47)<sup>17</sup> as compared with our agonistic antibody (9 nM binding Kd). ITIM-containing inhibitory receptors need to be in proximity to the activating receptors to recruit SHP1 and dephosphorylate activating receptors.<sup>1,10</sup> To test whether the agonistic anti-SIRP $\alpha$  could inhibit immune complex activation without protein A crosslinking of anti-SIRP $\alpha$  and IgG2a together, we added fragment antigen binding 2 (F(ab')<sub>2</sub>) to RAW 264.7 cells stimulated with immune complex. We did not observe inhibition of TNF $\alpha$  and G-CSF with anti-SIRP $\alpha$  F(ab')<sub>2</sub> (Figure S1C). Thus, these *in vitro* data demonstrate the anti-inflammatory effects of the agonistic SIRP $\alpha$  antibody requires crosslinking with activating receptors.

We next tested our agonistic anti-SIRP $\alpha$  antibody *in vivo* in a zymosan-induced peritonitis model, which is commonly used to quantify the recruitment of monocytes and neutrophils into the peritoneal cavity.<sup>18</sup> The agonistic anti-SIRP $\alpha$ , but not a commercial anti-SIRP $\alpha$  antagonist antibody,<sup>8</sup> significantly attenuated the frequency and number of neutrophils and monocytes in the peritoneal lavage (Figures 2C and S1D). Reduction of neutrophils and monocytes was associated with reduced TNF $\alpha$ , interleukin (IL)-1 $\beta$ , and G-CSF in peritoneal lavage (Figure 2D). Treatment with the CD47-Fc fusion protein was associated with a trend in inhibiting neutrophil/monocyte infiltration and cytokine production (Figures 2C and 2D). We observed a similar effect of the agonistic anti-SIRP $\alpha$  antibody on neutrophil recruitment using the thioglycollate induced peritonitis model (Figures S1E and S1F), which indicates that agonistic SIRP $\alpha$  antibody reduces neutrophil and inflammatory monocyte tissue infiltration in two independent innate stimuli.

In order to test whether the agonistic SIRP $\alpha$  antibody could directly affect immune cell migration, we injected a neutrophil and monocyte chemokine CXCL1 into the peritoneal cavity, and quantified CXCL1-mediated neutrophil and monocyte chemotaxis. The agonistic anti-SIRP $\alpha$  antibody, but not control SIRP $\alpha$  antibody, reduced the frequency and number of peritoneal neutrophils and monocytes (Figures 2E and S1G). Blockade of LFA-1 and MAC-1-dependent endothelial cell adhesion abrogated the difference between isotype control or anti-SIRP $\alpha$  antibody-treated mice (Figure 2F). There was no effect on neutrophils and monocytes in the spleen (Figure S1H), indicating the agonistic anti-SIRP $\alpha$  inhibited integrin-dependent *trans*-endothelial tissue migration. Consistent with our *in vitro* data that antibody crosslinking is necessary for inhibition, no effect was seen using an SIRP $\alpha$  Fc mutant antibody (D265A and N297A, dubbed DANA), which lacks the ability to bind to Fc receptors<sup>19</sup>

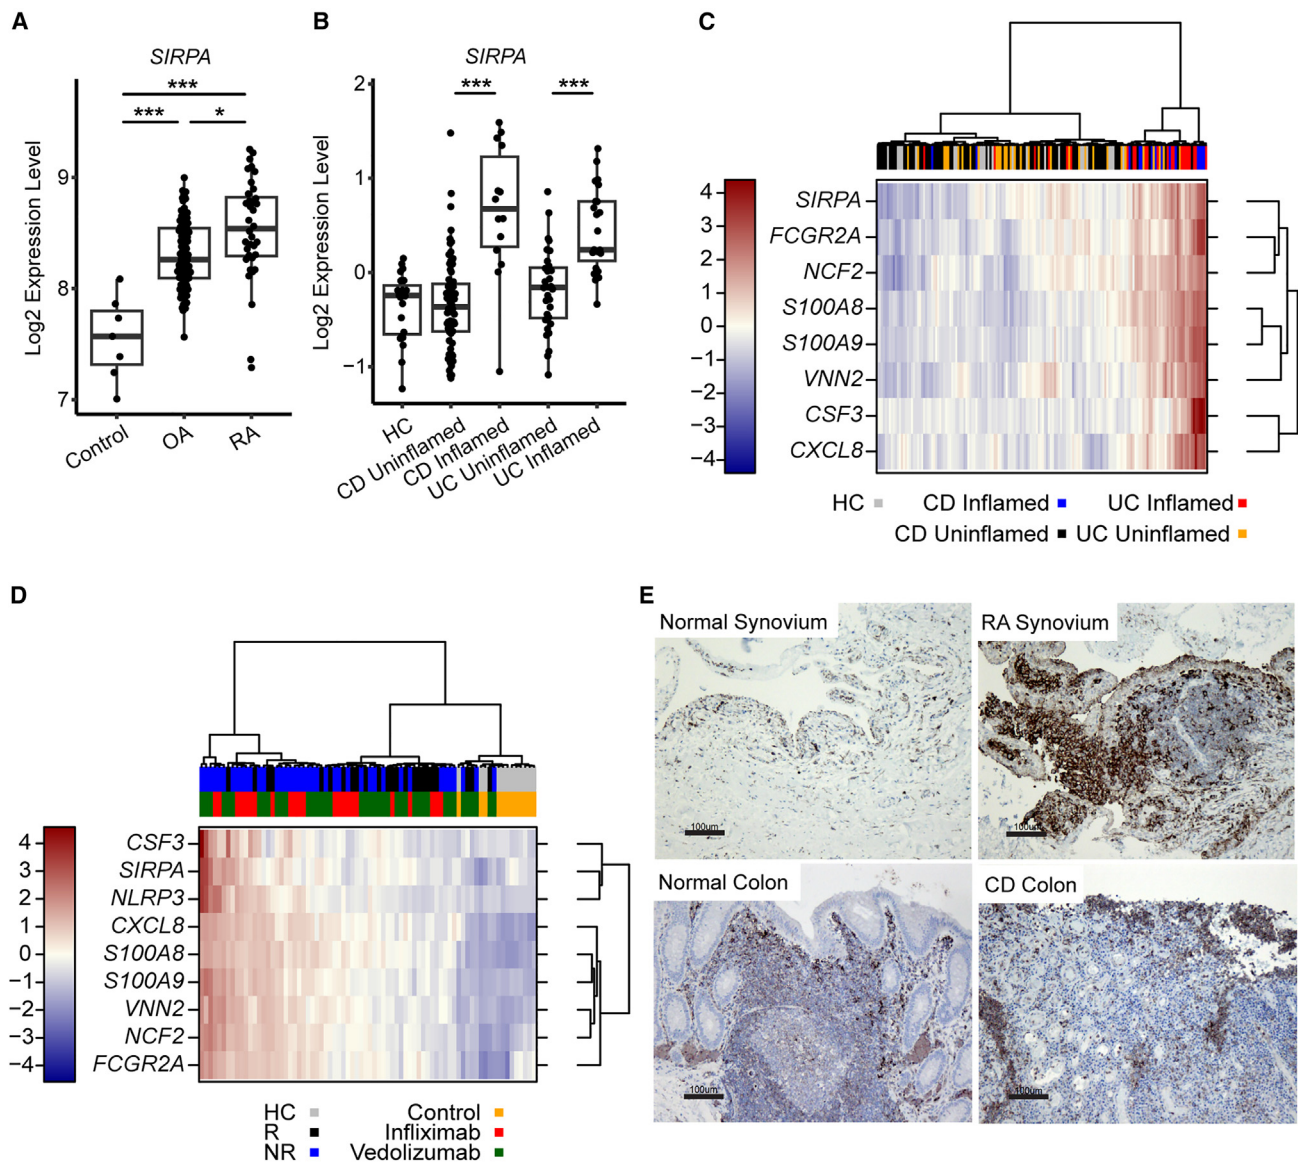

**Figure 1. Elevated  $SIRP\alpha^+$  myeloid cells in inflammatory tissues and associated with treatment non-responsiveness**

(A) Transcriptional data of  $SIRPA$  expression in synovial biopsies from healthy control, OA, and RA patients ( $n = 69$ ; each dot represents an individual patient biopsy).

(B) Transcriptional data of  $SIRPA$  expression in colon biopsies from healthy control, CD, and UC patients ( $n = 254$ ; each dot represents an individual patient biopsy).

(C) Transcriptional heatmap of  $SIRPA$  and other neutrophil-/monocyte-associated genes in colonic biopsies from healthy control (HC), inflamed, and uninflamed UC/CD colonic biopsies. Data are presented as  $\log_2$  relative expression.

(D) Transcriptional heatmap of  $SIRPA$  and other neutrophil-/monocyte-associated genes in baseline colonic biopsies of patients who responded (R) or non-responded (NR) with infliximab or vedolizumab. Data are presented as  $\log_2$  relative expression.

(E) Immunohistochemical (IHC) staining of  $SIRP\alpha$  in normal or RA synovium (top row) and normal or CD colons (bottom row). Scale bar, 100  $\mu\text{m}$  (one representative image was selected from each group with 3–5 biopsy samples). Data were analyzed using a Kruskal-Wallis test with Dunn's multiple comparisons test.  $p$  values ( $*p < 0.05$ ,  $**p < 0.01$ ,  $***p < 0.001$ ) were calculated using a one-way ANOVA and accounting for multiple testing.

(Figure S1I). These data indicate that Fc receptor binding by agonistic anti- $SIRP\alpha$  antibody is critical for *in vivo* crosslinking of  $SIRP\alpha$  to inhibit cell migration.  $SIRP\alpha$  was reported to inhibit integrin-dependent cell adhesion and immune cell migration through activation of RhoA and cytoskeletal rearrangement.<sup>12,20</sup>

Supporting the anti-chemotactic effects of anti- $SIRP\alpha$  treatment, bone marrow neutrophils isolated from the agonistic anti- $SIRP\alpha$  antibody-treated mice had reduced CXCL1-induced *ex vivo* chemotaxis in a transwell assay (Figure 2G). Reduced neutrophil chemotaxis by anti- $SIRP\alpha$  antibody is  $SIRP\alpha$

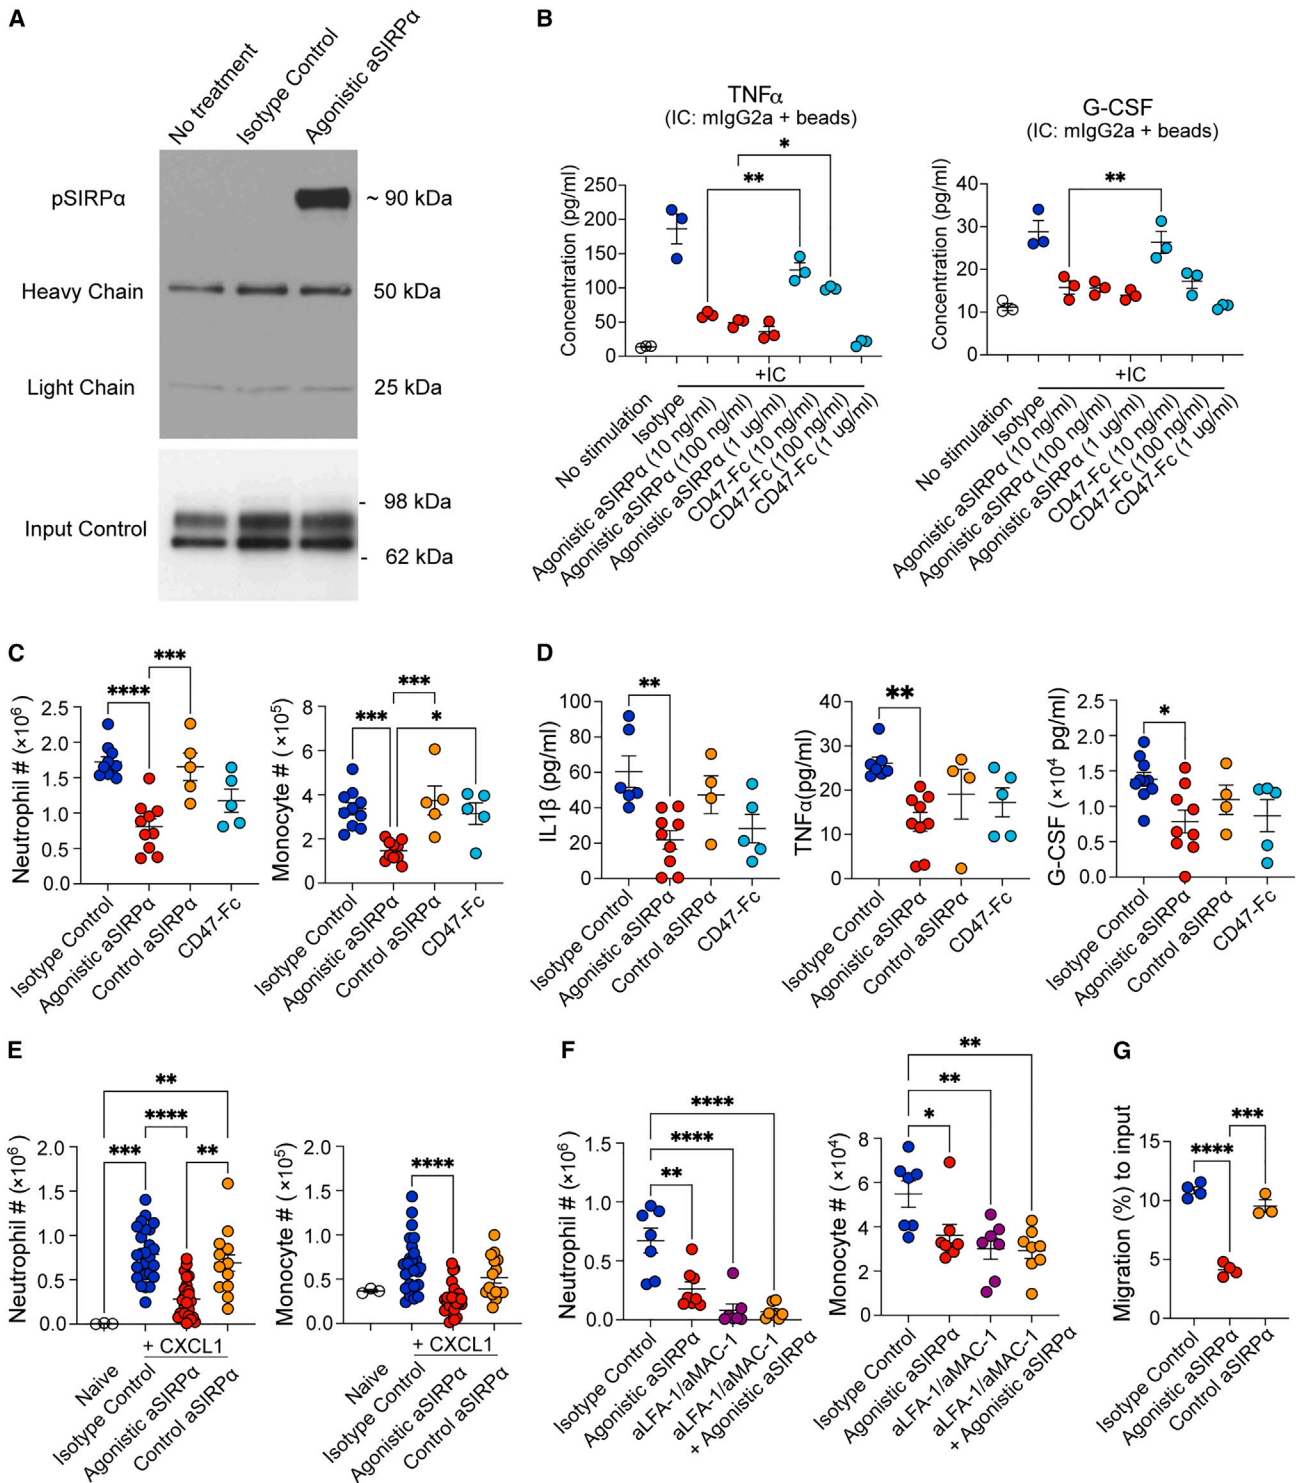

**Figure 2. The agonistic anti-SIRP $\alpha$  antibody limits neutrophil and inflammatory monocyte immune infiltration**

(A) Immunoblot analysis of phosphorylated SIRP $\alpha$ . RAW264.7 cells were stimulated with no treatment, isotype control, or agonistic anti-SIRP $\alpha$  for 5 min.

(B) TNF $\alpha$  and G-CSF in supernatant from RAW 264.7 cells stimulated by mlgG2a-protein A beads immune complex (IC) in the presence of isotype control, agonistic anti-SIRP $\alpha$ , or CD47-Fc.

(C) Flow cytometric quantification of mouse neutrophil (Ly6G $^+$ CD11b $^+$ ) and monocyte (Ly6C $^+$ CD11b $^+$ ) cell number from peritoneal lavage collected 6 h after zymosan injection.

(legend continued on next page)

dependent, as no reduction was observed in SIRP $\alpha$ -deficient mice (Figure S1J). Taken together, these data reveal that the agonistic anti-SIRP $\alpha$  antibody inhibits neutrophil and monocyte migration to tissues during inflammation.

### The anti-SIRP $\alpha$ agonist antibody ameliorates experimental arthritis through inhibiting neutrophil and monocyte infiltration

Given the elevated expression of SIRP $\alpha$  expression in human RA biopsies, and that the agonistic SIRP $\alpha$  antibody inhibited monocytes and neutrophil tissue migration, we next sought to investigate the effect of the agonistic anti-SIRP $\alpha$  antibody in a K/BxN serum-induced arthritis preclinical model. In this model, inflammation and associated joint damage is driven by serum autoantibodies against ubiquitously expressed self-antigen, glucose-6-phosphate isomerase (G6PI), which leads to the formation and deposition of immune complexes, followed by infiltration of pathogenic neutrophils and inflammatory monocytes, leading to joint injury.<sup>21,22</sup> The agonistic anti-SIRP $\alpha$  antibody significantly diminished the paw and joint erythema and edema clinical arthritis scores as compared with isotype control and CD47-Fc fusion protein (Figures 3A and 3D). Histological analysis revealed reduced arthritis severity, characterized by reduced synovial and intra-articular inflammation, with attenuation of articular cartilage erosion and bone remodeling in the animals treated with the agonistic anti-SIRP $\alpha$  antibody (Figures 3B and 3C).

In this KBxN serum transfer arthritis model, neutrophils and monocytes are the primary cellular drivers of disease pathogenesis.<sup>21,22</sup> Treatment with depleting antibodies to Ly6G<sup>+</sup> neutrophils significantly ameliorated arthritis preclinical manifestations, and furthermore, depleting Ly6G<sup>+</sup>/Ly6C<sup>+</sup> neutrophils and monocytes together led to an even greater effect on inflammation, completely abrogating disease (Figures 3A–3D). Depletion of neutrophils and monocytes in the blood and spleen by anti-Ly6G (neutrophil depletion) and anti-Ly6C/G antibodies was confirmed by flow cytometry; however, depletion was not seen in mice treated with the agonistic anti-SIRP $\alpha$  antibody (Figures S2A and S2B). This indicates disease amelioration by agonistic SIRP $\alpha$  antibody is not through an antibody-dependent cell cytotoxicity (ADCC) mechanism. Corroborating the effect of the anti-SIRP $\alpha$  agonistic antibody in dampening neutrophil and monocyte migration to inflamed tissues, the agonistic anti-SIRP $\alpha$  antibody reduced more than 80% neutrophils and inflammatory monocytes in joint synovial fluids (Figures 3E and S2C), but increased the number of neutrophils and monocytes in systemic lymphoid organ spleen (Figures 3F and S2D). The redistribution of neutrophils in spleen and joint corroborates our findings that anti-SIRP $\alpha$  antibody affects *trans*-endothelial neutrophil/monocyte tissue migration (Figures 2E–2G). Further-

more, we collected joint tissues from mice treated with isotype control and anti-SIRP $\alpha$  antibodies for RNA-sequencing and observed a reduction of genes associated with neutrophils/monocytes as well as proinflammatory chemokines and cytokines (Figure 3G and Table S3). Last, to test whether the agonistic anti-SIRP $\alpha$  antibody could be efficacious in a preclinical arthritis model initiated from more complex antigen-specific T cell activation, cytokine activation, and subsequent innate cell activation, we tested the efficacy of our agonistic anti-SIRP $\alpha$  antibody and CD47-Fc fusion protein in a collagen-induced arthritis model. We observed a significant amelioration of joint swelling, edema, and erythema in mice treated with the agonistic anti-SIRP $\alpha$  antibody and a reduction in arthritis severity on histopathology (Figures 3H, 3I, and 3J). Taken together, our data indicate that the agonistic anti-SIRP $\alpha$  antibody ameliorates joint inflammation and arthritis via inhibiting detrimental neutrophil and monocyte infiltration in inflamed joints.

### The agonistic anti-SIRP $\alpha$ ameliorates T cell transfer colitis through reducing neutrophil and inflammatory monocyte in tissues

During T cell-mediated autoimmunity, CD4<sup>+</sup> T cell-derived cytokines, such as IL-17 and IL-22, promote tissue inflammation through recruiting neutrophils and monocytes.<sup>23,24</sup> Neutrophil infiltration is a hallmark of histological manifestations seen in active UC.<sup>25,26</sup> We asked whether our agonistic anti-SIRP $\alpha$  could inhibit neutrophil and monocyte recruitment in a T cell transfer colitis model. In this model, adoptive transfer of sorted CD45RB<sup>high</sup>CD4<sup>+</sup> T cells into C.B.17 SCID mice initially causes the activation of autoreactive Th1/Th17 T cells, followed by neutrophil and monocyte infiltration and tissue destruction.<sup>27–29</sup> We investigated the therapeutic efficacy of anti-SIRP $\alpha$  agonistic antibody in a T cell transfer colitis and initiated the treatment right after T cell transfer (Figure S3A). Anti-SIRP $\alpha$  agonistic antibody treatment significantly reduced body weight loss (Figure S3B) and reduced visual colon and histopathology score (Figure S3C). To test whether anti-SIRP $\alpha$  agonistic antibody is efficacious in established colitis, we treated mice with an isotype control, agonistic anti-SIRP $\alpha$  antibody, or anti-Integrin  $\beta$ 7 blocking antibody 6 weeks after T cell adoptive transfer when animals had exhibited significant body weight loss and diarrhea, indicative of disease (Figure 4A). Therapeutic treatment with the agonistic anti-SIRP $\alpha$  antibody led to a trend in improvement in the body weight (Figure S3D), improved visual colon score measuring colon edema and thickness (Figure 4B), and decreased histopathological scores (Figures 4B and 4C). Fewer foci of epithelial inflammation, decreased crypt loss, and reduced reactive epithelial hyperplasia was observed in animals treated with the agonistic anti-SIRP $\alpha$  (Figure 4C). Treatment of the anti-Integrin

(D) IL-1 $\beta$ , TNF $\alpha$ , and G-CSF in peritoneal lavage collected 6 h after zymosan injection with indicated treatment.

(E and F) Mice were treated with isotype control, agonistic anti-SIRP $\alpha$ , and control anti-SIRP $\alpha$  antibodies. Overnight after antibody treatment, neutrophil and monocyte cell number were quantified by flow cytometry quantification in peritoneal cavity 4 h post intraperitoneal injection of recombinant CXCL1. In (F), indicated groups of mice were pre-treated with blocking antibodies against LFA-1 and MAC-1 16 h before CXCL1 injection.

(G) Mice were treated isotype control, agonistic anti-SIRP $\alpha$ , or control anti-SIRP $\alpha$  antibody. Overnight, after the treatment, migration of bone marrow neutrophils from indicated mouse groups in response to CXCL1 (2 ng/mL) was quantified by a transwell migration assay. Data are from one representative experiment of three independent experiments with at least three biological replicates per group. Each symbol represents one individual mouse. Bar graph is shown as mean  $\pm$  standard error. \*p < 0.05, \*\*p < 0.01, \*\*\*p < 0.001, and \*\*\*\*p < 0.0001, by ordinary one-way ANOVA with Tukey's multiple comparisons test.

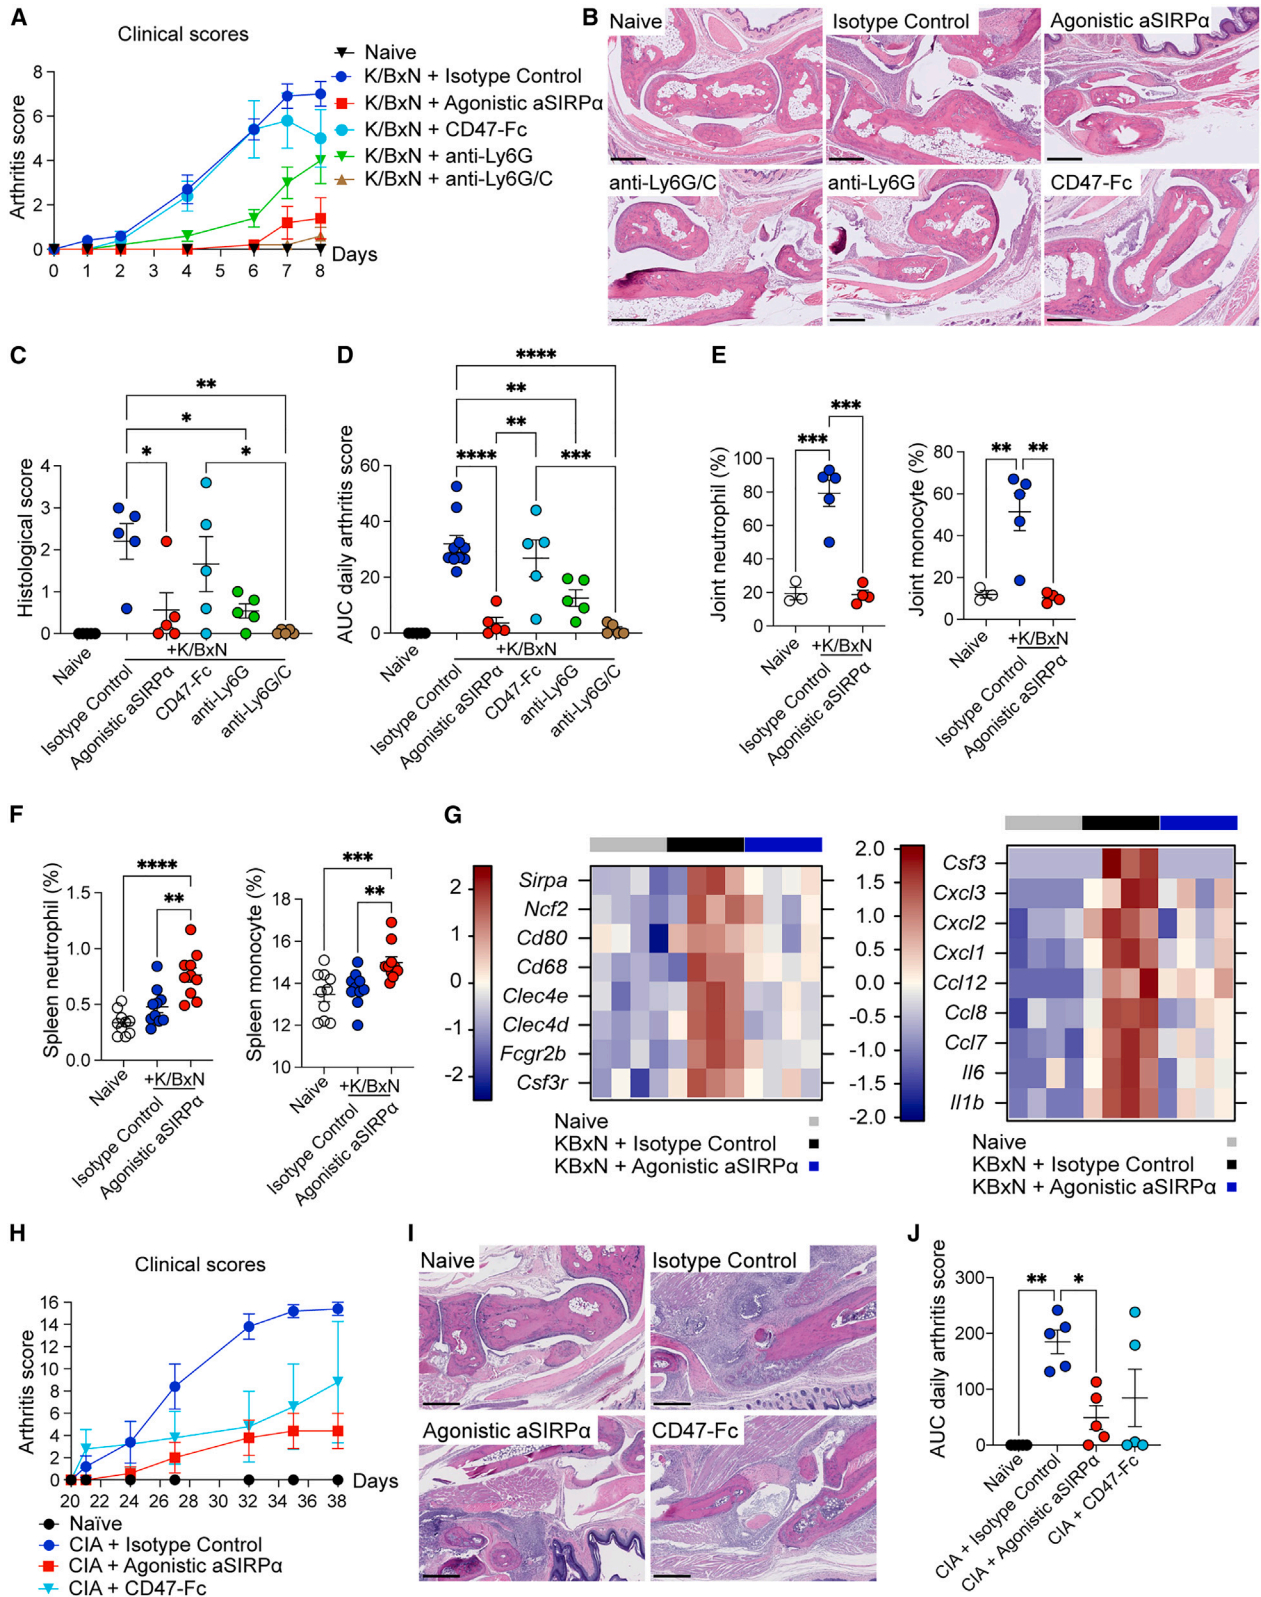

(legend on next page)

$\beta 7$  antibody (FIB504) showed a trend of improvement in visual colon and histopathology score (Figures 4B and 4C). Furthermore, we performed automated image analysis on the entire colon tissue sections that were immunohistochemically stained with anti-CD4, anti-F4/80, and anti-GR1. We found that treatment with the SIRP $\alpha$  agonist antibody significantly reduced the GR1<sup>+</sup> neutrophil/monocytes in mucosa and lamina propria regions (Figure 4F). The agonist anti-SIRP $\alpha$  antibody had no effect on the frequency of CD4<sup>+</sup> T cells and F4/80<sup>+</sup> macrophages (Figures 4D and 4E). As a control, a trend in the reduction of CD4<sup>+</sup> T frequency in lamina propria and intestinal mucosa was observed for mice treated with anti-Integrin  $\beta 7$  antibody (Figure 4D). Taken together, our data indicate that the efficacy of the agonistic anti-SIRP $\alpha$  antibody in the T cell-mediated transfer colitis preclinical model is through the inhibition of neutrophil and/or monocyte recruitment into inflamed colon tissues.

## DISCUSSION

Despite the successful application of anti-CD47 and anti-SIRP $\alpha$  blocking antibodies in cancer immunotherapy, agonism of inhibitory SIRP $\alpha$  to restrain excessive immune activation in the context of autoimmune inflammation has not been attempted. Here, we provide a proof of concept for an agonistic anti-SIRP $\alpha$  antibody to inhibit innate immune activation and therapeutic intervention in experimental autoimmune arthritis and colitis conditions. There were elevated SIRP $\alpha$ <sup>+</sup> neutrophils and monocytes in inflamed tissues from RA and IBD patients. The agonistic anti-SIRP $\alpha$  antibody attenuated inflammation through inhibiting detrimental neutrophil and monocyte tissue infiltration. In preclinical animal models of autoimmune arthritis and colitis, the agonistic anti-SIRP $\alpha$  antibody was highly efficacious in dampening inflammation, dramatically improving tissue pathology. Our study provides a therapeutic approach to agonize inhibitory immune receptors and curb excessive inflammation and autoimmunity.

SIRP $\alpha$  is an important modulator regulating innate immune activation. SIRP $\alpha$  has a long intracellular domain that contains four tyrosine residues to form two ITIM motifs, which are highly evolutionarily conserved across mouse, rat, and human.<sup>1</sup> Binding of SIRP $\alpha$  with its extracellular ligand CD47 results in phosphorylation of ITIM and phosphorylated ITIMs serve as recruitment sites for SHP1 and SHP2 phosphatase.<sup>6</sup> This leads to an inhibition of cell signaling events, negatively impacting phagocytosis, TNF $\alpha$  production, integrin-dependent adhesion, and *in vitro* transmigration.<sup>10–12,30</sup> Engagement of SIRP $\alpha$  with CD47 leads to dysregulated Rho activation, cell skeleton rearrangement, and inhibition of cell migration.<sup>12</sup> Consistent with earlier re-

ports of migration inhibition by SIRP $\alpha$  and SHP1,<sup>11,12,20</sup> we observed that the agonistic anti-SIRP $\alpha$  antibody was highly effective in reducing neutrophil and monocyte infiltration in peritoneal lavage, arthritic joints, and inflamed colon tissues. Neutrophils from the agonistic anti-SIRP $\alpha$ -treated mice showed reduced ability for chemotaxis. Furthermore, reduction of neutrophils and monocytes in the joint tissues was associated with an increase of these cells in the spleen, indicating inhibition of tissue infiltration likely happens at the step of *trans*-endothelial migration. Indeed, the difference in cell infiltration diminished after blockade of LFA-1/MAC-1 and integrin-dependent adhesion. SIRP $\alpha$  agonism serves as an effective approach to inhibit neutrophil and monocyte-mediated tissue damage.

SIRP $\alpha$  location was reported as one of the key determinants of receptor activity.<sup>10</sup> Without CD47, SIRP $\alpha$  is relegated to the phosphatase-rich zone outside of immune synapse.<sup>10,31</sup> This localization prevents SIRP $\alpha$  activation as well as excluding its interaction with activating receptors.<sup>10</sup> During CD47 engagement, SIRP $\alpha$  is recruited to the Src-kinase immune synapse,<sup>10</sup> where it is activated and suppresses engulfment, cell skeleton rearrangement, and cytokine secretion. Such spatial segregation of inhibitory and activating receptors is similar between SIRP $\alpha$  for myeloid cells and CD45 phosphatase for T cell receptors.<sup>10,32</sup> Therefore, the regulation of SIRP $\alpha$  inhibitory receptor requires the temporal recruitment to the immunological synapse to enable activating receptor inactivation. Corroborating the critical role of spatial localization of SIRP $\alpha$  for inhibitory signaling transduction, we found that crosslinking SIRP $\alpha$  with the activating receptor was required for *in vitro* inhibition of macrophage Fc receptor-induced cytokine secretion (Figure 2). *In vivo* efficacy of the agonistic anti-SIRP $\alpha$  required an Fc effector function and we observed a reduced efficacy and activity of anti-SIRP $\alpha$  antibody in effectorless Fc format (Figure S3E). We could not see any evidence of ADCC for our agonistic anti-SIRP $\alpha$  and instead we hypothesize that *in vivo* Fc receptor binding may facilitate *trans*- or *cis*-SIRP $\alpha$  clustering to bring SIRP $\alpha$  into the immune synapse during the neutrophil/monocyte adhesion and migration process. Such a requirement for Fc receptor binding and/or activating receptor crosslinking is also seen with other inhibitory agonistic antibodies, including PD-1, BTLA, and CD200R1 agonistic antibodies.<sup>5,33–35</sup> It is not yet known which Fc receptors (e.g., FCGR1IA, FCGR1IB, FCGR3IA) and which cells crosslink SIRP $\alpha$  receptor to enable *in vivo* inhibitory receptor agonism. More than one type of Fc receptors could be involved. Our data suggest that multi-specific protein scaffold with higher magnitude of inhibitory receptor clustering and crosslinking between inhibitory and activating

### Figure 3. Anti-SIRP $\alpha$ agonistic antibody ameliorates experimental arthritis through reducing neutrophil and monocyte infiltration

(A–G) Mice received indicated treatment agents following K/BxN serum transfer. (A) Daily arthritis score. (B and C) Representative joint histopathology image and paw/joint histological scores of mice 8 days post K/BxN serum transfer. Scale bar, 500  $\mu$ m. (D) Area under the curve (AUC) of total clinical arthritis scores. (E and F) Flow cytometric quantification of neutrophils and monocytes (F) from knee joint (E) and spleen (F) on 8 days post K/BxN serum transfer. (G) RNA sequencing of total paw tissues (each from four individual mice) of naive, isotype control, and agonistic anti-SIRP $\alpha$  treated mice 7 days post K/BxN serum transfer. Heat maps showing differential expression of genes related to myeloid cells (left) and genes of cytokines and chemokines (right). (H and J) Clinical arthritis scores of naive or collagen-induced arthritis (CIA) mice with treatments of isotype control, agonistic anti-SIRP $\alpha$ , and CD47-Fc. (I) Representative joint histopathology of naive or CIA mice that received indicated treatment. Scale bar, 500  $\mu$ m. Data are from one representative experiment of two independent experiments with at least three technical replicates per group. Each symbol represents one mouse. \*p < 0.05, \*\*p < 0.01, \*\*\*p < 0.001, and \*\*\*\*p < 0.0001, by ordinary one-way ANOVA with Tukey's multiple comparisons test.



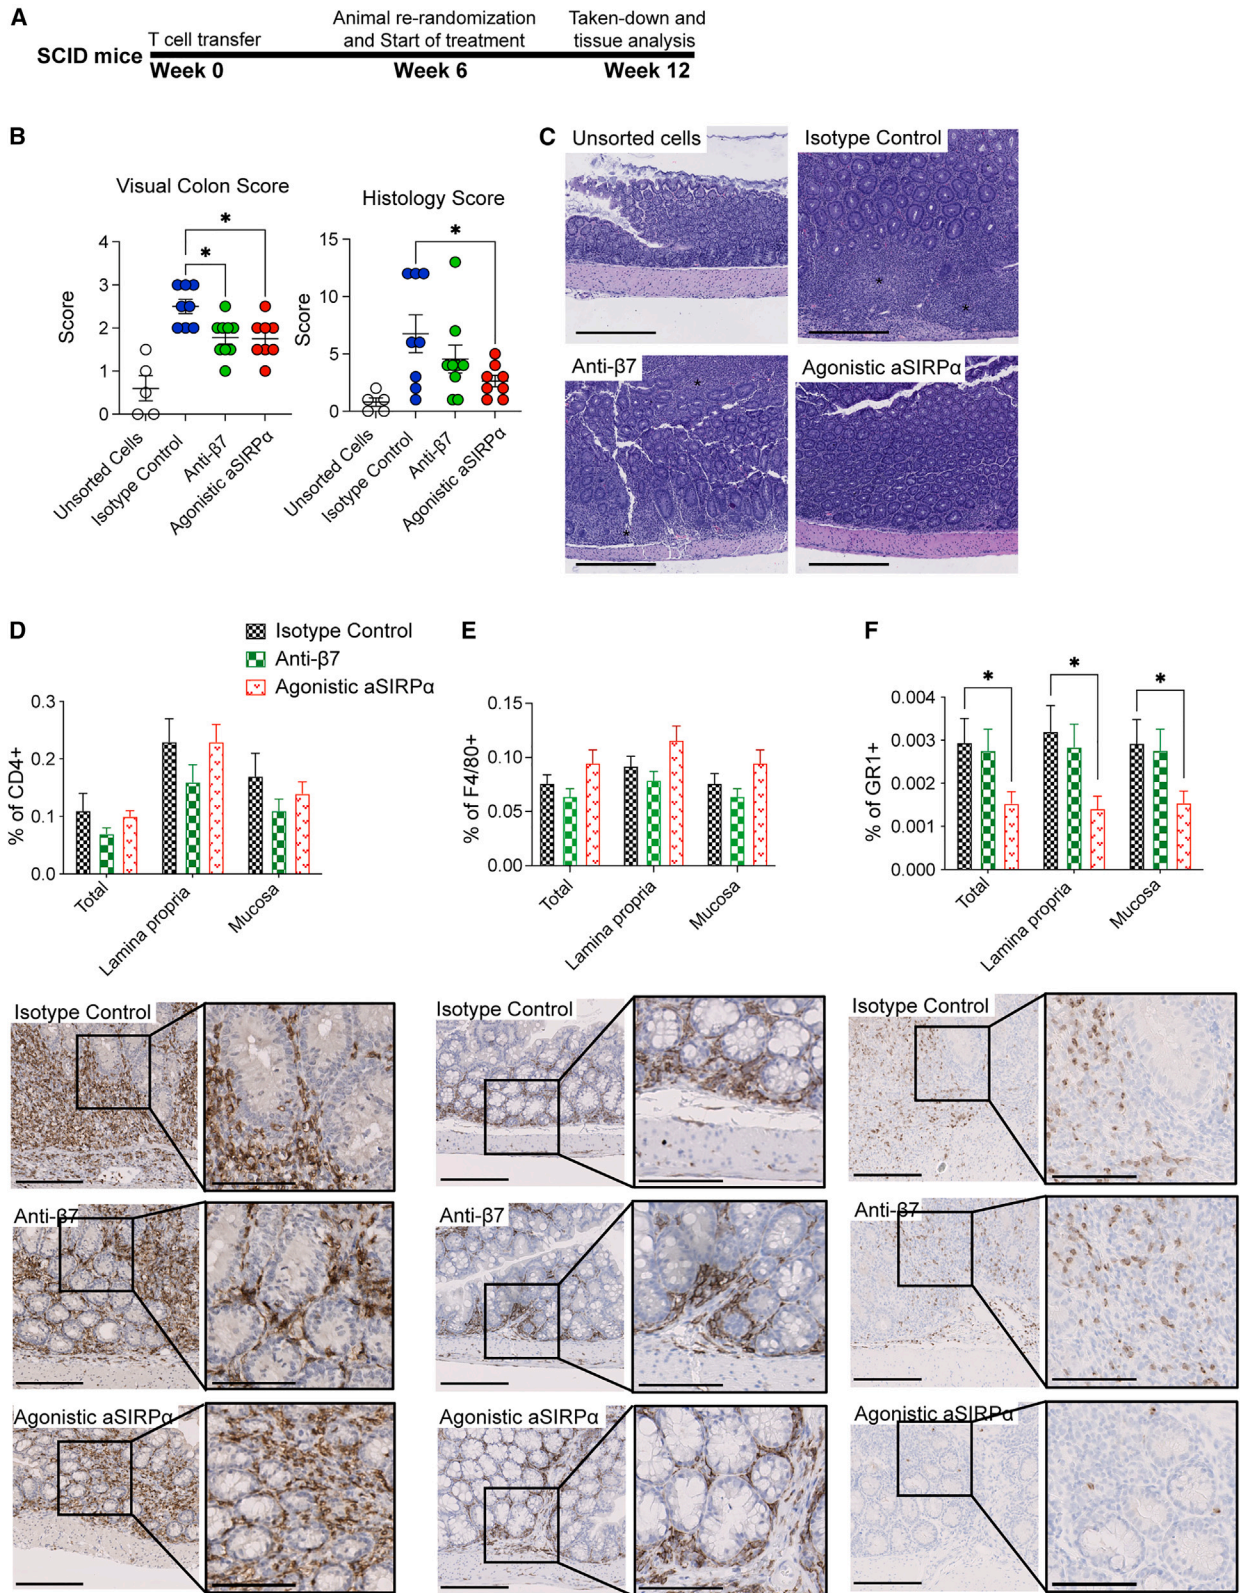

(legend on next page)

receptors may deliver stronger inhibitory signal transduction and immune cascade suppression.

Despite the advance in effective therapeutics against inflammatory cytokines (e.g., TNF $\alpha$ , IL-23), cytokine signaling (e.g., JAK1, TYK2), and integrin-dependent adaptive immune trafficking (e.g., integrin  $\alpha$ 4 and  $\alpha$ 4 $\beta$ 7), there remains high number of inflammatory disease patients who are refractory to current treatment, representing a tremendous unmet medical need. There are limited therapeutic options for targeting innate immune cell infiltrations. Our data suggest that agonism of inhibitory receptors on myeloid cells by anti-SIRP $\alpha$  may represent an approach to limit pathogenic innate immune infiltration and chronic tissue inflammation.

### Limitations of the study

Our current study focused on investigating how anti-SIRP $\alpha$  agonistic antibody regulates cellular response in the context of preclinical inflammatory conditions. It remains unclear the molecular mechanism by which SIRP $\alpha$  agonism regulates cell migration. In addition, Fc effector function is required for agonistic activity, but it is not yet known which Fc receptors and which cells crosslink SIRP $\alpha$  receptor to enable *in vivo* inhibitory receptor agonism. Further experiments to investigate SIRP $\alpha$  signaling in the context of leukocyte trafficking could provide additional mechanistic information. Finally, clinical studies of SIRP $\alpha$  or other ITIM-containing receptor agonistic antibodies will be necessary to fully evaluate the therapeutic translatability of our findings.

### STAR★METHODS

Detailed methods are provided in the online version of this paper and include the following:

- KEY RESOURCES TABLE
- RESOURCE AVAILABILITY
  - Lead contact
  - Materials availability
  - Data and code availability
- EXPERIMENTAL MODEL AND STUDY PARTICIPANT DETAILS
  - Mice
  - Human clinical cohorts
- METHOD DETAILS
  - Agonistic monoclonal anti-SIRP $\alpha$  generation
  - K/BxN serum transfer arthritis model
  - Collagen induced arthritis (CIA) model
  - Peritonitis models

- CD45RB<sup>high</sup>CD4<sup>+</sup> T cell transfer colitis model
- CXCL1-mediated cell recruitment assay
- Histology
- Immunohistochemistry
- Flow cytometry/FACS analysis
- *In vitro* cell culture
- Western blot/Immunoprecipitation
- Bone marrow cell isolation and transwell migration assay
- RNAseq and bioinformatics analysis
- QUANTIFICATION AND STATISTICAL ANALYSIS

### SUPPLEMENTAL INFORMATION

Supplemental information can be found online at <https://doi.org/10.1016/j.xcrm.2023.101130>.

### ACKNOWLEDGMENTS

We thank Saiyu Hang for critically reviewing this manuscript. We thank Genentech Research Pathology Core Laboratories (Necropsy, Histology, and Immunohistochemistry), FACS Core Laboratory, and Laboratory Animal Systems and Reports staff for their assistance. This research was supported and funded by Genentech, Inc., USA.

### AUTHOR CONTRIBUTIONS

M.M.X. performed *in vitro* and *in vivo* experiments, analyzed data, and wrote the manuscript; J.A.H. analyzed data; M.J.T. and D.A.F. contributed to the acquisition of human data; B.D., S.T., J.Z., A.S., J.K.J., S.J., R.A.I.C., Y.L., Y.F., H.B., E.R.S., M.E.K., J.B., G.N., W.P.L., and P.J.G. provided support with data analysis and designed and executed experiments. M.M.X. and J.A.H. performed statistical analyses. P.G. initiated the project and supervised SIRP $\alpha$  antibody generation. M.M.X., F.M., R.P., and T.Y. designed experiments and wrote the manuscript; all authors were involved in manuscript editing and finalization.

### DECLARATION OF INTERESTS

All authors except D.A.F. are current or past employees of Genentech, a member of the Roche group, and may hold Roche stock or stock options.

Received: December 24, 2022

Revised: May 23, 2023

Accepted: June 30, 2023

Published: July 24, 2023

### REFERENCES

1. Daëron, M., Jaeger, S., Du Pasquier, L., and Vivier, E. (2008). Immunoreceptor tyrosine-based inhibition motifs: a quest in the past and future. *Immunol. Rev.* 224, 11–43. <https://doi.org/10.1111/j.1600-065X.2008.00666.x>.

### Figure 4. The agonistic anti-SIRP $\alpha$ ameliorates T cell transfer colitis through reducing neutrophils and inflammatory monocytes in tissues

(A) Schema of the CD45RB<sup>high</sup>CD4<sup>+</sup> T cell transfer colitis therapeutic model. C.B17 SCID mice were transferred with unsorted splenocytes or sorted CD45RB<sup>high</sup>CD4<sup>+</sup> T cells. Six weeks post cell transfer, all mice were re-randomized and started with indicated treatments every other day. All mice were euthanized 12 weeks post cell transfer for tissue collection and histopathology.

(B and C) Visual colon scores and histological scores of colons. (C) Hematoxylin and eosin staining of colon. Asterisks indicate increased lamina propria inflammation, epithelial hyperplasia, and areas of crypt loss. Scale bar, 400  $\mu$ m.

(D–F) IHC staining of colons was conducted per standard protocols on an autostainer. Sections were stained with antibodies for CD4, F4/80, and GR1(Ly6G/C). Scale bar, 200  $\mu$ m; inset scale bar, 100  $\mu$ m. Data are from one representative experiment of two independent experiments with at least three biological replicates per group. Each symbol represents one mouse. \*p < 0.05, \*\*p < 0.01, \*\*\*p < 0.001, and \*\*\*\*p < 0.0001, by ordinary one-way ANOVA with Tukey's multiple comparisons test.

2. Getahun, A., and Cambier, J.C. (2015). Of ITiMs, ITAMs, and ITAMis: revisiting immunoglobulin Fc receptor signaling. *Immunol. Rev.* 268, 66–73. <https://doi.org/10.1111/immr.12336>.
3. Young, A., Quandt, Z., and Bluestone, J.A. (2018). The Balancing Act between Cancer Immunity and Autoimmunity in Response to Immunotherapy. *Cancer Immunol. Res.* 6, 1445–1452. <https://doi.org/10.1158/2326-6066.CIR-18-0487>.
4. Chao, M.P., Takimoto, C.H., Feng, D.D., McKenna, K., Gip, P., Liu, J., Volkmer, J.P., Weissman, I.L., and Majeti, R. (2019). Therapeutic Targeting of the Macrophage Immune Checkpoint CD47 in Myeloid Malignancies. *Front. Oncol.* 9, 1380. <https://doi.org/10.3389/fonc.2019.01380>.
5. Paluch, C., Santos, A.M., Anzilotti, C., Cornall, R.J., and Davis, S.J. (2018). Immune Checkpoints as Therapeutic Targets in Autoimmunity. *Front. Immunol.* 9, 2306. <https://doi.org/10.3389/fimmu.2018.02306>.
6. Barclay, A.N., and Van den Berg, T.K. (2014). The interaction between signal regulatory protein alpha (SIRPalpha) and CD47: structure, function, and therapeutic target. *Annu. Rev. Immunol.* 32, 25–50. <https://doi.org/10.1146/annurev-immunol-032713-120142>.
7. Myers, D.R., Abram, C.L., Wildes, D., Belwafa, A., Welsh, A.M.N., Schulze, C.J., Choy, T.J., Nguyen, T., Omaque, N., Hu, Y., et al. (2020). Shp1 Loss Enhances Macrophage Effector Function and Promotes Anti-Tumor Immunity. *Front. Immunol.* 11, 576310. <https://doi.org/10.3389/fimmu.2020.576310>.
8. Yi, T., Li, J., Chen, H., Wu, J., An, J., Xu, Y., Hu, Y., Lowell, C.A., and Cyster, J.G. (2015). Splenic Dendritic Cells Survey Red Blood Cells for Missing Self-CD47 to Trigger Adaptive Immune Responses. *Immunity* 43, 764–775. <https://doi.org/10.1016/j.immuni.2015.08.021>.
9. Oldenborg, P.A., Zheleznyak, A., Fang, Y.F., Lagenaur, C.F., Gresham, H.D., and Lindberg, F.P. (2000). Role of CD47 as a marker of self on red blood cells. *Science* 288, 2051–2054. <https://doi.org/10.1126/science.288.5473.2051>.
10. Morrissey, M.A., Kern, N., and Vale, R.D. (2020). CD47 Ligation Repositions the Inhibitory Receptor SIRPA to Suppress Integrin Activation and Phagocytosis. *Immunity* 53, 290–302.e6. <https://doi.org/10.1016/j.immuni.2020.07.008>.
11. Liu, D.Q., Li, L.M., Guo, Y.L., Bai, R., Wang, C., Bian, Z., Zhang, C.Y., and Zen, K. (2008). Signal regulatory protein alpha negatively regulates beta2 integrin-mediated monocyte adhesion, transendothelial migration and phagocytosis. *PLoS One* 3, e3291. <https://doi.org/10.1371/journal.pone.0003291>.
12. Motegi, S.I., Okazawa, H., Ohnishi, H., Sato, R., Kaneko, Y., Kobayashi, H., Tomizawa, K., Ito, T., Honma, N., Bühring, H.J., et al. (2003). Role of the CD47-SHPS-1 system in regulation of cell migration. *EMBO J.* 22, 2634–2644. <https://doi.org/10.1093/emboj/cdg278>.
13. Willingham, S.B., Volkmer, J.P., Gentles, A.J., Sahoo, D., Dalerba, P., Mitra, S.S., Wang, J., Contreras-Trujillo, H., Martin, R., Cohen, J.D., et al. (2012). The CD47-signal regulatory protein alpha (SIRPalpha) interaction is a therapeutic target for human solid tumors. *Proc. Natl. Acad. Sci. USA* 109, 6662–6667. <https://doi.org/10.1073/pnas.1121623109>.
14. Feng, M., Jiang, W., Kim, B.Y.S., Zhang, C.C., Fu, Y.X., and Weissman, I.L. (2019). Phagocytosis checkpoints as new targets for cancer immunotherapy. *Nat. Rev. Cancer* 19, 568–586. <https://doi.org/10.1038/s41568-019-0183-z>.
15. Friedrich, M., Pohin, M., Jackson, M.A., Korsunsky, I., Bullers, S.J., Rue-Albrecht, K., Christoforidou, Z., Sathananthan, D., Thomas, T., Ravindran, R., et al. (2021). IL-1-driven stromal-neutrophil interactions define a subset of patients with inflammatory bowel disease that does not respond to therapies. *Nat. Med.* 27, 1970–1981. <https://doi.org/10.1038/s41591-021-01520-5>.
16. Arijs, I., De Hertogh, G., Lemmens, B., Van Lommel, L., de Bruyn, M., Vanhove, W., Cleynen, I., Machiels, K., Ferrante, M., Schuit, F., et al. (2018). Effect of vedolizumab (anti-alpha4beta7-integrin) therapy on histological healing and mucosal gene expression in patients with UC. *Gut* 67, 43–52. <https://doi.org/10.1136/gutjnl-2016-312293>.
17. Logtenberg, M.E.W., Scheeren, F.A., and Schumacher, T.N. (2020). The CD47-SIRPalpha Immune Checkpoint. *Immunity* 52, 742–752. <https://doi.org/10.1016/j.immuni.2020.04.011>.
18. Louwe, P.A., Badiola Gomez, L., Webster, H., Perona-Wright, G., Bain, C.C., Forbes, S.J., and Jenkins, S.J. (2021). Recruited macrophages that colonize the post-inflammatory peritoneal niche convert into functionally divergent resident cells. *Nat. Commun.* 12, 1770. <https://doi.org/10.1038/s41467-021-21778-0>.
19. Shields, R.L., Namenuk, A.K., Hong, K., Meng, Y.G., Rae, J., Briggs, J., Xie, D., Lai, J., Stadlen, A., Li, B., et al. (2001). High resolution mapping of the binding site on human IgG1 for Fc gamma RI, Fc gamma RII, Fc gamma RIII, and FcRn and design of IgG1 variants with improved binding to the Fc gamma R. *J. Biol. Chem.* 276, 6591–6604. <https://doi.org/10.1074/jbc.M009483200>.
20. Inagaki, K., Yamao, T., Noguchi, T., Matozaki, T., Fukunaga, K., Takada, T., Hosooka, T., Akira, S., and Kasuga, M. (2000). SHPS-1 regulates integrin-mediated cytoskeletal reorganization and cell motility. *EMBO J.* 19, 6721–6731. <https://doi.org/10.1093/emboj/19.24.6721>.
21. Christensen, A.D., Haase, C., Cook, A.D., and Hamilton, J.A. (2016). K/BxN Serum-Transfer Arthritis as a Model for Human Inflammatory Arthritis. *Front. Immunol.* 7, 213. <https://doi.org/10.3389/fimmu.2016.00213>.
22. Wipke, B.T., and Allen, P.M. (2001). Essential role of neutrophils in the initiation and progression of a murine model of rheumatoid arthritis. *J. Immunol.* 167, 1601–1608. <https://doi.org/10.4049/jimmunol.167.3.1601>.
23. Kvedaraitė, E. (2021). Neutrophil-T cell crosstalk in inflammatory bowel disease. *Immunology* 164, 657–664. <https://doi.org/10.1111/imm.13391>.
24. Bernshtein, B., Curato, C., Ioannou, M., Thaiss, C.A., Gross-Vedder, M., Kolesnikov, M., Wang, Q., David, E., Chappell-Maor, L., Harmelin, A., et al. (2019). IL-23-producing IL-10Ralpha-deficient gut macrophages elicit an IL-22-driven proinflammatory epithelial cell response. *Sci. Immunol.* 4, eaau6571. <https://doi.org/10.1126/sciimmunol.aau6571>.
25. Kucharzik, T., Walsh, S.V., Chen, J., Parkos, C.A., and Nusrat, A. (2001). Neutrophil transmigration in inflammatory bowel disease is associated with differential expression of epithelial intercellular junction proteins. *Am. J. Pathol.* 159, 2001–2009. [https://doi.org/10.1016/S0002-9440\(10\)63051-9](https://doi.org/10.1016/S0002-9440(10)63051-9).
26. Muthas, D., Reznichenko, A., Balendran, C.A., Böttcher, G., Clausen, I.G., Kärrman Mårdh, C., Ottosson, T., Uddin, M., MacDonald, T.T., Danese, S., and Berner Hansen, M. (2017). Neutrophils in ulcerative colitis: a review of selected biomarkers and their potential therapeutic implications. *Scand. J. Gastroenterol.* 52, 125–135. <https://doi.org/10.1080/00365521.2016.1235224>.
27. Yen, D., Cheung, J., Scheerens, H., Poulet, F., McClanahan, T., McKenzie, B., Kleinschek, M.A., Owyang, A., Mattson, J., Blumenschein, W., et al. (2006). IL-23 is essential for T cell-mediated colitis and promotes inflammation via IL-17 and IL-6. *J. Clin. Invest.* 116, 1310–1316. <https://doi.org/10.1172/JCI21404>.
28. Ostanin, D.V., Bao, J., Koboziev, I., Gray, L., Robinson-Jackson, S.A., Kosloski-Davidson, M., Price, V.H., and Grisham, M.B. (2009). T cell transfer model of chronic colitis: concepts, considerations, and tricks of the trade. *Am. J. Physiol. Gastrointest. Liver Physiol.* 296, G135–G146. <https://doi.org/10.1152/ajpgi.90462.2008>.
29. Fournier, B.M., and Parkos, C.A. (2012). The role of neutrophils during intestinal inflammation. *Mucosal Immunol.* 5, 354–366. <https://doi.org/10.1038/mi.2012.24>.
30. Abram, C.L., and Lowell, C.A. (2017). Shp1 function in myeloid cells. *J. Leukoc. Biol.* 102, 657–675. <https://doi.org/10.1189/jlb.2MR0317-105R>.
31. Goodridge, H.S., Reyes, C.N., Becker, C.A., Katsumoto, T.R., Ma, J., Wolf, A.J., Bose, N., Chan, A.S.H., Magee, A.S., Danielson, M.E., et al. (2011). Activation of the innate immune receptor Dectin-1 upon formation of a phagocytic synapse. *Nature* 472, 471–475. <https://doi.org/10.1038/nature10071>.

32. James, J.R., and Vale, R.D. (2012). Biophysical mechanism of T-cell receptor triggering in a reconstituted system. *Nature* 487, 64–69. <https://doi.org/10.1038/nature11220>.
33. Cherwinski, H.M., Murphy, C.A., Joyce, B.L., Bigler, M.E., Song, Y.S., Zurawski, S.M., Moshrefi, M.M., Gorman, D.M., Miller, K.L., Zhang, S., et al. (2005). The CD200 receptor is a novel and potent regulator of murine and human mast cell function. *J. Immunol.* 174, 1348–1356. <https://doi.org/10.4049/jimmunol.174.3.1348>.
34. Shane Krummen Atwell, A.C.V., and Obungu, V.H. (2020). BTLA agonist antibodies and uses thereof. patent US 10, 604. patent application 15/977,003 Mar. 31.
35. Suzuki, K., Tajima, M., Tokumaru, Y., Oshiro, Y., Nagata, S., Kamada, H., Kihara, M., Nakano, K., Honjo, T., and Ohta, A. (2023). Anti-PD-1 antibodies recognizing the membrane-proximal region are PD-1 agonists that can down-regulate inflammatory diseases. *Sci. Immunol.* 8, eadd4947. <https://doi.org/10.1126/sciimmunol.add4947>.
36. Faubion, W.A., Jr., Fletcher, J.G., O'Byrne, S., Feagan, B.G., de Villiers, W.J., Salzberg, B., Plevy, S., Proctor, D.D., Valentine, J.F., Higgins, P.D., et al. (2013). EMerging BiomARKers in Inflammatory Bowel Disease (EMBARCK) study identifies fecal calprotectin, serum MMP9, and serum IL-22 as a novel combination of biomarkers for Crohn's disease activity: role of cross-sectional imaging. *Am. J. Gastroenterol.* 108, 1891–1900. <https://doi.org/10.1038/ajg.2013.354>.
37. Dennis, G., Jr., Holweg, C.T.J., Kummerfeld, S.K., Choy, D.F., Setiadi, A.F., Hackney, J.A., Haverty, P.M., Gilbert, H., Lin, W.Y., Diehl, L., et al. (2014). Synovial phenotypes in rheumatoid arthritis correlate with response to biologic therapeutics. *Arthritis Res. Ther.* 16, R90. <https://doi.org/10.1186/ar4555>.
38. Erben, U., Loddenkemper, C., Doerfel, K., Spieckermann, S., Haller, D., Heimesaat, M.M., Zeitz, M., Siegmund, B., and Kühl, A.A. (2014). A guide to histomorphological evaluation of intestinal inflammation in mouse models. *Int. J. Clin. Exp. Pathol.* 7, 4557–4576.
39. Patrick Caplazi, L.D. (2014). Histopathology in Mouse Models of Rheumatoid Arthritis. In *Molecular Histopathology and Tissue Biomarkers in Drug and Diagnostic Development* (Humana Press), pp. 65–78. [https://doi.org/10.1007/7653\\_2014\\_20](https://doi.org/10.1007/7653_2014_20).
40. De Giovanni, M., Tam, H., Valet, C., Xu, Y., Looney, M.R., and Cyster, J.G. (2022). GPR35 promotes neutrophil recruitment in response to serotonin metabolite 5-HIAA. *Cell* 185, 815–830.e19. <https://doi.org/10.1016/j.cell.2022.01.010>.
41. Dai, B., Hackney, J.A., Ichikawa, R., Nguyen, A., Elstrott, J., Orozco, L.D., Sun, K.H., Modrusan, Z., Gogineni, A., Scherl, A., et al. (2021). Dual targeting of lymphocyte homing and retention through alpha4beta7 and alphaE-beta7 inhibition in inflammatory bowel disease. *Cell Rep. Med.* 2, 100381. <https://doi.org/10.1016/j.xcrm.2021.100381>.

STAR★METHODS

KEY RESOURCES TABLE

| REAGENT or RESOURCE                                    | SOURCE         | IDENTIFIER                           |
|--------------------------------------------------------|----------------|--------------------------------------|
| <b>Antibodies</b>                                      |                |                                      |
| APC/Cy7 anti-mouse SIRP $\alpha$ (clone P84)           | BioLegend      | Catalog #: 144018; RRID:AB_2629558   |
| APC/Cy7 anti-mouse GR-1 (clone: RB6-8C5)               | BioLegend      | Catalog #: 108424; RRID:AB_2137485   |
| APC/Cy7 anti-mouse F4/80 (clone: BM8)                  | BioLegend      | Catalog #: 123118; RRID:AB_893477    |
| PE/Cy7 anti-mouse Ly6G (clone: 1A8)                    | BioLegend      | Catalog #: 127618; RRID:AB_1877261   |
| PE/Cy7 anti-mouse CD8a (clone: 53-6.7)                 | BioLegend      | Catalog #: 100722; RRID:AB_312761    |
| PE/Cy7 anti-mouse SIRP $\alpha$ (clone: P84)           | BioLegend      | Catalog #: 144008; RRID:AB_2563546   |
| PE/Cy7 anti-mouse CD11c (clone: N418)                  | BioLegend      | Catalog #: 117318; RRID:AB_493568    |
| PE/Cy7 anti-mouse CD86 (clone: GL-1)                   | BioLegend      | Catalog #: 105014; RRID:AB_439783    |
| BUV395 anti-mouse CD11b (clone: M1/70)                 | BD Biosciences | Catalog #: 563553; RRID:AB_2738276   |
| BV421 anti-mouse CD4 (clone: RM4-4)                    | BioLegend      | Catalog #: 116023; RRID:AB_2800579   |
| BV421 anti-mouse Ly6C (clone: HK1.4)                   | BioLegend      | Catalog #: 128014; RRID:AB_1732079   |
| BV421 anti-mouse F4/80 (clone: BM8)                    | BioLegend      | Catalog #:123132; RRID:AB_11203717   |
| BV421 anti-mouse I-A/I-E (clone: M5/114.15.2)          | BioLegend      | Catalog #: 107632; RRID:AB_2650896   |
| PE anti-mouse F4/80 (clone: BM8)                       | BioLegend      | Catalog #: 123110; RRID:AB_893486    |
| PE anti-mouse Ly6C (clone: HK1.4)                      | BioLegend      | Catalog #: 128008; RRID:AB_1186132   |
| PERCP/Cy5.5 F4/80 (clone: BM8)                         | BioLegend      | Catalog #: 123128; RRID:AB_893484    |
| PERCP/Cy5.5 Ly6C (clone: HK1.4)                        | BioLegend      | Catalog #: 128012; RRID:AB_1659241   |
| PERCP/Cy5.5 CD4 (clone: RM4-5)                         | BioLegend      | Catalog #: 100540; RRID:AB_893326    |
| PERCP/Cy5.5 Ly6G (clone: 1A8)                          | BioLegend      | Catalog #: 127616; RRID:AB_1877271   |
| PERCP/Cy5.5 I-A/I-E (clone: M5/114.15.2)               | BioLegend      | Catalog #: 107626; RRID:AB_2191071   |
| APC anti-mouse Ly6G (clone: 1A8)                       | BioLegend      | Catalog #: 127614; RRID:AB_2227348   |
| APC anti-mouse F4/80 (clone: BM8)                      | BioLegend      | Catalog #: 123116; RRID:AB_893481    |
| APC anti-mouse CD11c (clone: N418)                     | BioLegend      | Catalog #: 117310; RRID:AB_313779    |
| APC anti-mouse CD4 (clone: RM4-5)                      | BioLegend      | Catalog #: 100516; RRID:AB_312719    |
| APC anti-mouse CD8a (clone: 53-6.7)                    | BioLegend      | Catalog #: 100766; RRID:AB_2572113   |
| FITC anti-mouse CD86 (clone: GL-1)                     | BioLegend      | Catalog #: 105005; RRID:AB_313148    |
| FITC anti-mouse Ly6C (clone: HK1.4)                    | BioLegend      | Catalog #: 128006; RRID:AB_1186135   |
| Anti-human SIRP $\alpha$ (Mouse IgG2b Clone #602411)   | R&D systems    | Catalog #: MAB4546; RRID:AB_10718553 |
| Anti-human CD4 (Polyclonal Goat IgG)                   | R&D systems    | Catalog #: AF-379-NA; RRID:AB_354469 |
| Anti-mouse F4/80 (clone: T45-2342)                     | BD Pharmingen  | Catalog #: BDB565410                 |
| Anti-mouse GR-1 (clone: T45-2342)                      | BD Pharmingen  | Catalog #: BDB553123                 |
| Fc block- anti-mouse CD16/32                           | BioLegend      | Catalog #: 101302; RRID:AB_312801    |
| Anti-mouse $\beta$ 7 (clone FIB504)                    | This paper     | Antibody ID: AB_2892125              |
| Agonist anti-mouse SIRP $\alpha$ (clone 6F2) see below | This paper     | this manuscript                      |

(Continued on next page)

**Continued**

| REAGENT or RESOURCE                                                                                                     | SOURCE                                                                                                                                                                                                                                                                                                                                                                                                                                                                                                       | IDENTIFIER                                      |
|-------------------------------------------------------------------------------------------------------------------------|--------------------------------------------------------------------------------------------------------------------------------------------------------------------------------------------------------------------------------------------------------------------------------------------------------------------------------------------------------------------------------------------------------------------------------------------------------------------------------------------------------------|-------------------------------------------------|
| Agonist anti-mouse SIRP $\alpha$ (clone 6F2)<br>Heavy Chain sequence:                                                   | EVQLVESGGGLVKGPGSLKLSAASGFSFSTYWM<br>TWVRQAPGKLEWVGEINEGGSTTNYAPSVK<br>GRFTISRDNARNTLFLQMNSVKSSEDAAAYCARDY<br>WDTPTYFDYWGQGTMTVSSAKTTAPSVYPLAPVC<br>GDTTGSSVTLGCLVKGYFPEPVTLTWNSGSLSSGV<br>HTFPAVLQSDLYTLSSSVTVTSSTWPSQSITCNVAH<br>PASSTKVDKKIEPRGPTIKPCPPCKCPAPNLLGGPSV<br>FIFPPKIKDVLMIKSLPIVTCVWVDVSEDDPDVQISWV<br>NNVEVHTAQTQTHREDYNSTLRVVSALPIQHGDW<br>MSGKEFKCKVNNKDLPAPIERTISKPKGSVRAPQVY<br>VLPPPEEEMTKKQVTLTCMVTFMPEDIYVEVTNN<br>GKTELNYKNTPEVLDSGSYFMYSKLRVEKK<br>NWVERNSYSCSVVHEGLHNHHTTKSFSRTPGK | this manuscript                                 |
| Agonist anti-mouse SIRP $\alpha$ (clone 6F2)<br>Light Chain sequence:                                                   | DIVMTQSPSSLAIVSVEKVTIGCKSSQSLLFN<br>KDQKNYLSWYLQKPGQSPKLLIYYASTRH<br>TGVPRDFIGSGSGTDFLTIDISVQSEDLADY<br>YCLQTYAPRTFGPGTKLEIKRADAAPT<br>SIFPPSSEQLTSGGASVWCFLNNFYPKDIN<br>VKWKIDGSERQNGVLNSWTDQDSKDY<br>SMSSTLTLTKDEYERHNSYTCEATHKST<br>SPIVKSFNREK                                                                                                                                                                                                                                                           | this manuscript                                 |
| Isotype Control (anti-GP120)                                                                                            | This paper                                                                                                                                                                                                                                                                                                                                                                                                                                                                                                   | this manuscript                                 |
| <i>InVivo</i> MAb anti-mouse Ly6G (clone: 1A8)                                                                          | BioXCell                                                                                                                                                                                                                                                                                                                                                                                                                                                                                                     | Catalog #: BE0075-1; Antibody ID:<br>AB_1107721 |
| <i>InVivo</i> MAb anti-mouse Ly6G/Ly6C GR-1<br>(clone: RB6-8C5)                                                         | BioXCell                                                                                                                                                                                                                                                                                                                                                                                                                                                                                                     | Catalog #: BE0075; Antibody ID:<br>AB_10312146  |
| Anti-rat IgG HRP for IP                                                                                                 | R&D systems                                                                                                                                                                                                                                                                                                                                                                                                                                                                                                  | Catalog #: HAF005; RRID:AB_1512258              |
| Anti-mouse SIRP $\alpha$ (clone: P84) for IP                                                                            | BD Biosciences                                                                                                                                                                                                                                                                                                                                                                                                                                                                                               | Catalog #: 552371; RRID:AB_394371               |
| Anti-phosphotyrosine (clone: 4G10)                                                                                      | EMD Millipore                                                                                                                                                                                                                                                                                                                                                                                                                                                                                                | Catalog #: 05-321X; RRID:AB_568858              |
| <b>Biological samples</b>                                                                                               |                                                                                                                                                                                                                                                                                                                                                                                                                                                                                                              |                                                 |
| Healthy or IBD patient intestinal<br>tissue biopsies                                                                    | Genentech                                                                                                                                                                                                                                                                                                                                                                                                                                                                                                    | GEO: GSE179285                                  |
| Healthy or arthritis patient synovial<br>tissue biopsies                                                                | University of Michigan                                                                                                                                                                                                                                                                                                                                                                                                                                                                                       | GEO: GSE48780 and GSE236924                     |
| <b>Chemicals, peptides, and recombinant proteins</b>                                                                    |                                                                                                                                                                                                                                                                                                                                                                                                                                                                                                              |                                                 |
| Complete Freund's Adjuvant                                                                                              | InvivoGen                                                                                                                                                                                                                                                                                                                                                                                                                                                                                                    | Catalog #: vac-cfa-60                           |
| Incomplete Freund's Adjuvant                                                                                            | InvivoGen                                                                                                                                                                                                                                                                                                                                                                                                                                                                                                    | Catalog #: vac-ifa-60                           |
| Zymosan                                                                                                                 | InvivoGen                                                                                                                                                                                                                                                                                                                                                                                                                                                                                                    | Catalog #: tlrl-zyn                             |
| Recombinant Mouse CXCL1                                                                                                 | R&D systems                                                                                                                                                                                                                                                                                                                                                                                                                                                                                                  | Catalog #: 453-KC-050                           |
| Recombinant Mouse CXCL1                                                                                                 | PeptoTECH                                                                                                                                                                                                                                                                                                                                                                                                                                                                                                    | Catalog #: 250-11-250UG                         |
| Thioglycollate Medium                                                                                                   | Sigma-Aldrich                                                                                                                                                                                                                                                                                                                                                                                                                                                                                                | SKU: 1462200100                                 |
| Protein A beads/DYNABEADS                                                                                               | Thermo fisher                                                                                                                                                                                                                                                                                                                                                                                                                                                                                                | Catalog #: 10002D                               |
| Red Blood Cell Lysing Buffer<br>Hybri-MaxTM                                                                             | Sigma-Aldrich                                                                                                                                                                                                                                                                                                                                                                                                                                                                                                | SKU: R7757-100ML                                |
| Protein A-agarose                                                                                                       | Roche                                                                                                                                                                                                                                                                                                                                                                                                                                                                                                        | Discontinued N/A                                |
| <b>Critical commercial assays</b>                                                                                       |                                                                                                                                                                                                                                                                                                                                                                                                                                                                                                              |                                                 |
| RNeasy Fibrous Tissue Mini Kit                                                                                          | QIAGEN                                                                                                                                                                                                                                                                                                                                                                                                                                                                                                       | Cat. No./ID: 74704                              |
| CD4 <sup>+</sup> T cell Isolation Kit, mouse                                                                            | Miltenyi Biotec                                                                                                                                                                                                                                                                                                                                                                                                                                                                                              | Order no. 130-104-454                           |
| Lipofectamine 2000 kit                                                                                                  | ThermoFisher Scientific                                                                                                                                                                                                                                                                                                                                                                                                                                                                                      | Catalog #: 11668019                             |
| HTS Transwell®-24-well Permeable<br>Support with 5.0 $\mu$ m Pore Polycarbonate<br>Membrane and 6.5 mm Inserts, Sterile | Corning                                                                                                                                                                                                                                                                                                                                                                                                                                                                                                      | Discontinued N/A                                |

(Continued on next page)

**Continued**

| REAGENT or RESOURCE                            | SOURCE                  | IDENTIFIER                                                          |
|------------------------------------------------|-------------------------|---------------------------------------------------------------------|
| High Sensitivity D1000 ScreenTape and reagents | Agilent Technologies    | Catalog #: 5067-5584                                                |
| IdeZ Protease                                  | Promega                 | Catalog #: 8341                                                     |
| SMARTer Stranded Total RNA-Seq Kit             | Takara                  | Catalog #: 634412                                                   |
| Qubit™ dsDNA HS and BR Assay Kits              | ThermoFisher Scientific | Catalog #: Q32851                                                   |
| <b>Deposited data</b>                          |                         |                                                                     |
| Bulk RNA-sequencing of mouse paw samples       | This paper              | GEO: GSE235400                                                      |
| Microarray of arthritis patient tissue samples | University of Michigan  | GEO: GSE48780 and GSE236924                                         |
| <b>Experimental models: Cell lines</b>         |                         |                                                                     |
| RAW 264.7 cells                                | ATCC                    | TIB-71                                                              |
| HEK 293T                                       | ATCC                    | CRL-1573                                                            |
| <b>Experimental models: Organisms/strains</b>  |                         |                                                                     |
| C57BL/6                                        | Charles River           | Strain code: 027                                                    |
| SIRPa-flox/flox Lyzm-Cre                       | This paper              | this manuscript                                                     |
| BALB/cAnNCrl                                   | Charles River           | Strain code: 028                                                    |
| C.B17 SCID                                     | Taconic                 | Model #: CB17SC-F                                                   |
| <b>Software and algorithms</b>                 |                         |                                                                     |
| R (v 3.5.1)                                    | The R Project           | <a href="http://www.r-project.org">http://www.r-project.org</a>     |
| GraphPad Prism v.8                             | GraphPad Software       | <a href="https://www.graphpad.com/">https://www.graphpad.com/</a>   |
| FlowJo v.10                                    | FlowJo                  | <a href="https://www.flowjo.com/">https://www.flowjo.com/</a>       |
| EndNote 20                                     | EndNote                 | <a href="https://endnote.com/">https://endnote.com/</a>             |
| Adobe Illustrator                              | Adobe                   | <a href="https://www.adobe.com/">https://www.adobe.com/</a>         |
| BioRender                                      | BioRender               | <a href="https://www.biorender.com/">https://www.biorender.com/</a> |

**RESOURCE AVAILABILITY**

**Lead contact**

Further information and requests for resources and reagents should be directed to and will be fulfilled by the lead contact, Tangsheng Yi ([tangshengyi@gmail.com](mailto:tangshengyi@gmail.com)).

**Materials availability**

All unique/stable reagents generated in this study are available from the corresponding author Tangsheng Yi ([tangshengyi@gmail.com](mailto:tangshengyi@gmail.com)) with a completed Materials Transfer Agreement (<https://www.gene.com/scientists/mta>).

**Data and code availability**

RNA-seq and gene expression data have been deposited at GEO and are publicly available as of the date of publication. Accession numbers are listed in the [key resources table](#). Any additional information required to reanalyze the data reported in this paper is available from the [lead contact](#) upon request. This work does not contain any custom software for the data analysis.

**EXPERIMENTAL MODEL AND STUDY PARTICIPANT DETAILS**

**Mice**

Female C57BL/6, Balb/c and C.B17 SCID mice were from Charles River Laboratories and were used at age 6–10 weeks for studies.

The generation of *Sirpa* conditional Knockout mouse (cKO): the construct for targeting the C57BL/6N *Sirpa* locus in ES cells was made using a combination of recombineering and standard molecular cloning techniques. Exons 1 and 2 were floxed by inserting a *loxP* site upstream of exon 1 and a *loxP-Frt-Pgk1-Neo-Frt* cassette downstream of exon 2. The final vector was confirmed by DNA sequencing. The *Sirpa* cKO vector was linearized and C57BL/6N C2 ES cells were targeted using standard methods (G418 positive and gancyclovir negative selection). Positive clones were identified using PCR and taqman analysis, and confirmed by sequencing. Correctly targeted ES cells were transfected with a Flpe plasmid to remove *Neo* and create the *Sirpa* conditional knock-out allele (cKO). *Sirpa* cKO ES cells were then injected into blastocysts using standard techniques, and germline transmission was obtained

after crossing resulting chimeras with C57BL/6N females. *Sirpa* flox mice were further crossed with LyzM-Cre (The Jackson Laboratory) to obtain LyzM-cre<sup>+</sup>*Sirpa*<sup>flox/flox</sup> cKO mice.

All mice used in this study were kept at Genentech under specific pathogen-free conditions. All protocols were reviewed and approved by the Genentech Institutional Animal Care and Use Committee.

### Human clinical cohorts

Expression in colon samples from healthy control, Crohn disease, or ulcerative colitis patient samples was measured by using microarrays (Agilent). 254 samples used for this analysis were from the internal Embark study (SPR1001)<sup>36</sup> and were obtained from Crohn's disease patients, Ulcerative Colitis patients, and healthy controls by ileocolonoscopy. Specifically, biopsies were taken in the sigmoid colon (n = 21) and ascending/descending colon of healthy controls; in the ascending/descending colon (n = 107) in uninfamed areas in all patients with Crohn's disease, as well as additional biopsies were taken in inflamed regions of the ascending/descending colon (n = 35) in patients with mucosal lesions. Paired uninfamed sigmoid (n = 48) and inflamed sigmoid biopsies (n = 46) were taken in Ulcerative Colitis patients. Extracted RNA was quantified using an Agilent human 4x44kv1 array.

Expression in two separate Rheumatoid Arthritis patient collections (Two sequential cohorts, n = 49 and n = 20) from the University of Michigan was measured by using Affymetrix microarrays. Detailed study information was published earlier.<sup>37</sup> All patients provided consent in accordance with Institutional Review Board guidance for each institution as noted above.

## METHOD DETAILS

### Agonistic monoclonal anti-SIRP $\alpha$ generation

Monoclonal antibodies were generated by immunizing hamsters with murine SIRP $\alpha$  extracellular domain fused to a human IgG1 Fc. Hybridomas were generated using traditional methods and supernatants were screened for binding to murine SIRP $\alpha$  by ELISA. Positive hybridoma clones were scaled up and purified for further characterization. Variable regions of top binders were molecularly cloned into murine IgG2a Fcs with and without DANA (D265A and N297A) mutations, recombinantly expressed and purified for further applications. To generate F(ab')<sub>2</sub> fragment of the antibody, IdeZ kit (Promega) was used. One unit of IdeZ protease was added per 1  $\mu$ g of the antibody and incubated at 37°C for 30 min before application for further studies.

### K/BxN serum transfer arthritis model

Mice were treated with indicated treatment group (250  $\mu$ g per mouse) every other day starting one day before serum transfer until the termination. Subsequently, mice were intravenously injected once with 100  $\mu$ l of arthrogenic K/BxN serum. Mice were checked and monitored for joint and paw clinical scoring every other day. Briefly the animals were scored as follows: 0, no evidence of erythema and swelling; 1, erythema and mild swelling confined to the mid-foot (tarsal) or ankle; 2, erythema and mild swelling extending from the ankle to the mid-foot; 3, erythema and moderate swelling extending from the ankle to the metatarsal joints; 4, erythema and severe swelling encompass the ankle, foot and digits. Total score was the sum of the 4 paw scores.

### Collagen induced arthritis (CIA) model

Mice were immunized with 100  $\mu$ g type II chicken collagen in 100  $\mu$ l Complete Freund's Adjuvant (CFA). The collagen type II in CFA were injected intradermally (i.d.) on the side of the back, with the dose divided into 2, 50  $\mu$ L injections. At Day 21, a second immunization with 100  $\mu$ g chicken collagen type II in 100  $\mu$ L of incomplete Freund's adjuvant was given i.d. on the side of the back, with the dose divided into 2, 50  $\mu$ L injections. Mice were treated with indicated antibodies (250  $\mu$ g/mouse) every other day starting one day before CIA recall responses on Day 21 post the first immunization. Paw and joint arthritic inflammation were scored on indicated dates. On Day 38, all paws were harvested for histopathological analysis. Mice were checked and monitored for joint and paw clinical scoring regularly. Briefly the animals were scored as follows: 0, no evidence of erythema and swelling; 1, erythema and mild swelling confined to the mid-foot (tarsal) or ankle; 2, erythema and mild swelling extending from the ankle to the mid-foot; 3, erythema and moderate swelling extending from the ankle to the metatarsal joints; 4, erythema and severe swelling encompass the ankle, foot and digits. Total score was the sum of the 4 paw scores.

### Peritonitis models

To elicit sterile peritoneal inflammation, mice pre-treated (16 h) with indicated antibodies (250  $\mu$ g/mouse/time) were intraperitoneally injected with 2 mg of Zymosan (Invivogene) suspended in 200  $\mu$ L PBS. Peritoneal lavage was done 6 h after zymosan injection. Briefly, 3 mL PBS was injected via i.p. and 2 mL of lavage was aspirated out using a syringe. To elicit thioglycollate-induced peritonitis mAbs pre-administered mice were injected with 5 mL of thioglycollate broth (Sigma-Aldrich) i.p. Peritoneal lavage was collected 6 h after thioglycollate injection. Cell pellets were collected after centrifuge for flow cytometric analysis while suspensions were used for cytokine Luminex assay.

### CD45RB<sup>high</sup>CD4<sup>+</sup> T cell transfer colitis model

On Week 0, mice received 3 x 10<sup>5</sup> CD45RB<sup>high</sup>CD4<sup>+</sup> T cells or unsorted T cells in 200  $\mu$ l PBS via i.v. For the preventive model, treatments were started the next day of T cell transfer (250  $\mu$ g/mouse/time). Mice were treated 3 times per week via subcutaneous (s.c.)



route in 200  $\mu$ L sterile PBS until the end of experiment. For the therapeutic model, all mice were bled by retro-orbital (RO) route under anesthesia for 200  $\mu$ L whole blood on heparin for flow cytometric analysis 6 weeks post adoptive T cell transfer. Animals were re-randomized and grouped out according to percentage and number of CD4 cells and body weight (BW). Treatments were started on the same day of re-randomization (250  $\mu$ g/mouse/time). Mice were treated 2 times per week via s.c. route in 200  $\mu$ L sterile PBS until end of experiment. Weights will be taken prior to cell transfer (baseline), week 6 and the termination of the study. Beginning at week 4, mice will be monitored daily for signs of IBD. The study will be terminated at week 12. At the end of the study mouse colons were harvested. A gross colon score and colon weight were determined after flushing the tissues with cold saline.<sup>38</sup> Colons were stored in formalin for histopathology analysis.

### CXCL1-mediated cell recruitment assay

Mice were injected intraperitoneally with 250  $\mu$ g mAbs in 200  $\mu$ L PBS 16 h prior to CXCL1 injection. To elicit CXCL1 induced cell recruitment, 4  $\mu$ g CXCL1 (R & D) suspended in 200  $\mu$ L PBS was injected intraperitoneally. After 4 h, peritoneal lavage was carried out by injecting 3 mL PBS i.p. and 2 mL of lavage was aspirated out using a syringe. Cell pellets were collected after centrifuge for flow cytometric analysis.

### Histology

In arthritis models, the left and right fore- and hindlimbs were immersion fixed in 10% neutral buffered formalin for 24 h, then hemi-sectioned, paraffin embedded and routinely processed. Forelimb sections comprised the distal radius, carpi, metacarpi and P1-3. Hindlimb sections included the distal tibia, occasionally the distal fibula, talus, tarsal, metatarsal bones, and P1-3. Duplicate sections of each limb were examined and scored on a scale of 0–5 based on the number of joints affected, and the severity of inflammation, spindle cell proliferation, cartilage erosion, and bone lysis and remodeling. A total arthritis severity score was calculated from the average of these scores across each limb.<sup>39</sup>

In the T cell transferred colitis model, colons were flushed with saline and fixed in 10% formalin overnight and processed into paraffin. 4- $\mu$ m sections were stained with hematoxylin and eosin and were scored for colitis severity by a pathologist. Each of 4 anatomical segments were scored on a scale of 0–5 based on extent of inflammation, epithelial hyperplasia, and epithelial loss, resulting in a summed score ranging from 0 to 20.

### Immunohistochemistry

IHC staining was conducted per standard protocols on an autostainer. In brief, sections were deparaffinized, subjected to antigen retrieval, and incubated with primary antibodies (SIRP $\alpha$ , CD4 - R&D Systems; F4/80, GR1 - Pharmingen), ABC-Peroxidase Elite secondary antibody system, and detection with 3,3'-Diaminobenzidine Chromogen.

### Flow cytometry/FACS analysis

Cell suspension was washed twice in staining buffer (PBS with 2% of fetal bovine serum), blocked with Fc block (anti-mouse CD16/32, Biolegend) for 5 min at room temperature, and stained with indicated fluorescence conjugated antibodies below for 20 min. Fluorochrome-conjugated anti-mouse antibodies used are as follows: SIRP $\alpha$  (P84), GR1 (RB6-8C5), F4/80 (BM8), Ly6G (1A8), CD11b (M1/70), MHCII (M5/114.15.2), Ly6C (HK1.4). All samples were acquired on a BD FACSymphony flow cytometer (Becton Dickinson) and analyzed with FlowJo software.

### In vitro cell culture

RAW 264.7 cells were cultured in Dulbecco's modified Eagle's medium (DMEM) containing 10% fetal calf serum and 100 mg/mL penicillin +100  $\mu$ g/mL streptomycin in a humidified 37°C incubator with 5% CO<sub>2</sub> and atmospheric oxygen (21% O<sub>2</sub>). For immune complex assay, RAW 264.7 cells were cultured at  $4 \times 10^5$  cells/well in 1 mL medium in 24-well flat bottom tissue culture plates. The cells were allowed to adhere overnight and the following day the medium was supplemented with indicated antibodies at 10  $\mu$ g/mL in medium for 1 h. After 1 h, 10  $\mu$ L DYNABEADS (PROTEIN A). After another 24 h' culture, 150  $\mu$ L medium supernatant from each well was collected for cytokine Luminex assay.

HEK 293T cells were grown to 80–90% confluency in 5 mL of DMEM with 10% FBS and 1% antibiotics in a 6 well plate. Cells were transfected with SIRP $\alpha$  expressing vectors by using Lipofectamine 2000 (ThermoFisher Scientific). 2.5  $\mu$ g of vector were mixed in 150  $\mu$ L Opti-MEMTM I reduced serum medium (ThermoFisher Scientific), and 15  $\mu$ L Lipofectamine 2000 was mixed in another 150  $\mu$ L Opti-MEMTM I reduced serum medium. After combining, this mixture was incubated at room temperature for 15 min. The combined mixture was gently added to the HEK293T cells culture plate. After 72 h, the cells were harvested for FACS analysis.

### Western blot/Immunoprecipitation

Raw 264.7 cells were seeded in a 6 well plate and treated at 90% confluence with 100 ng/mL antibody for 5 min. Cells treated with media alone serves as a no treatment control. After 5 min media was aspirated and cells were lysed with 400  $\mu$ L IP lysis buffer (Pierce) containing a phosphatase inhibitor cocktail (Sigma) and Complete protease inhibitor (Roche) and kept on ice. Lysates were immunoprecipitated with 2  $\mu$ g anti-phosphotyrosine clone 4G10 (EMD Millipore) for 1 h at 4°C. Immune complexes were precipitated with

Protein A-agarose (Roche), washed three times in lysis buffered prior to running on SDS-PAGE. Proteins were transferred to nitrocellulose (Invitrogen) and blocked with 5% BSA in TRIS-buffered saline tween 20 and blotted using anti-SIRP $\alpha$  clone P84 (BD) and anti-rat IgG HRP (R&D). Proteins were visualized by chemiluminescence (Amersham).

### Bone marrow cell isolation and transwell migration assay

Mice were injected intraperitoneally with 250  $\mu$ g indicated antibodies in 200  $\mu$ l PBS 20 h prior to bone marrow collection. Bone marrow cells were collected from two femurs and red blood cells were lysed using the lysis buffer (Red Blood Cell Lysing Buffer Hybri-Max, Sigma-ALDRICH). Bone marrow cells were washed in migration medium (RPMI containing 0.5% fatty acid-free BSA, 10 mM HEPES and 50 IU/L penicillin/streptomycin) and resuspended in migration medium at  $2 \times 10^6$  cells/ml. Cells were resensitized for 10 min in a 37°C water bath in migration medium. To set up the migration assay, 600  $\mu$ l CXCL1 containing migration medium was added into the transwell bottom. Transwell filters (6 mm insert, 5  $\mu$ m pore size, Corning) were placed on top of each well, and 100  $\mu$ l containing  $2 \times 10^5$  cells of each group was added to the transwell insert. The cells were allowed to migrate for 3 h, after which the cells in the bottom well were counted by flow cytometry. As described in,<sup>40</sup> a percentage of input migration was plotted as cell migration.

### RNAseq and bioinformatics analysis

Mouse hind paws from one KB/xN study were collected and unskinned for RNA isolation. RNA was isolated from tissues using the QIAGEN RNeasy Fibrous Tissue Mini Kit (QIAGEN) according to the manufacturer's instructions. Total RNA was quantified with Qubit RNA HS Assay Kit (Thermo Fisher Scientific) and quality was assessed using RNA ScreenTape on 4200 TapeStation (Agilent Technologies). For sequencing library generation, the SMARTer Stranded Total RNA-Seq Kit v2 – Pico Input Mammalian kit (Takara) was used with an input of 1–2 ng of total RNA. Libraries were quantified with Qubit dsDNA HS Assay Kit (Thermo Fisher Scientific) and the average library size was determined using High Sensitivity D1000 ScreenTape on 4200 TapeStation (Agilent Technologies). Libraries were pooled and sequenced on NovaSeq 6000 (Illumina) to generate 30 million single-end 50-base pair reads for each sample. For RNA-seq analysis, we used custom scripts written in the R programming language and packages from the Bioconductor project as described before.<sup>41</sup>

### QUANTIFICATION AND STATISTICAL ANALYSIS

GraphPad Prism software was used for statistical analysis. Graph bars represent the mean  $\pm$  SEM. Unless otherwise stated, One-Way ANOVA with Tukey's post hoc analysis was used to determine significance. Significant differences ( $p < 0.05$ ) are indicated in the figures.

**Cell Reports Medicine, Volume 4**

**Supplemental information**

**An agonistic anti-signal regulatory protein  $\alpha$   
antibody for chronic inflammatory diseases**

**Markus M. Xie, Bingbing Dai, Jason A. Hackney, Tianhe Sun, Juan Zhang, Janet K. Jackman, Surinder Jeet, Ricardo A. Irizarry-Caro, Yongyao Fu, Yuxin Liang, Hannah Bender, Eliah R. Shamir, Mary E. Keir, Jack Bevers, Gerald Nakamura, Michael J. Townsend, David A. Fox, Alexis Scherl, Wyne P. Lee, Flavius Martin, Paul J. Godowski, Rajita Pappu, and Tangsheng Yi**

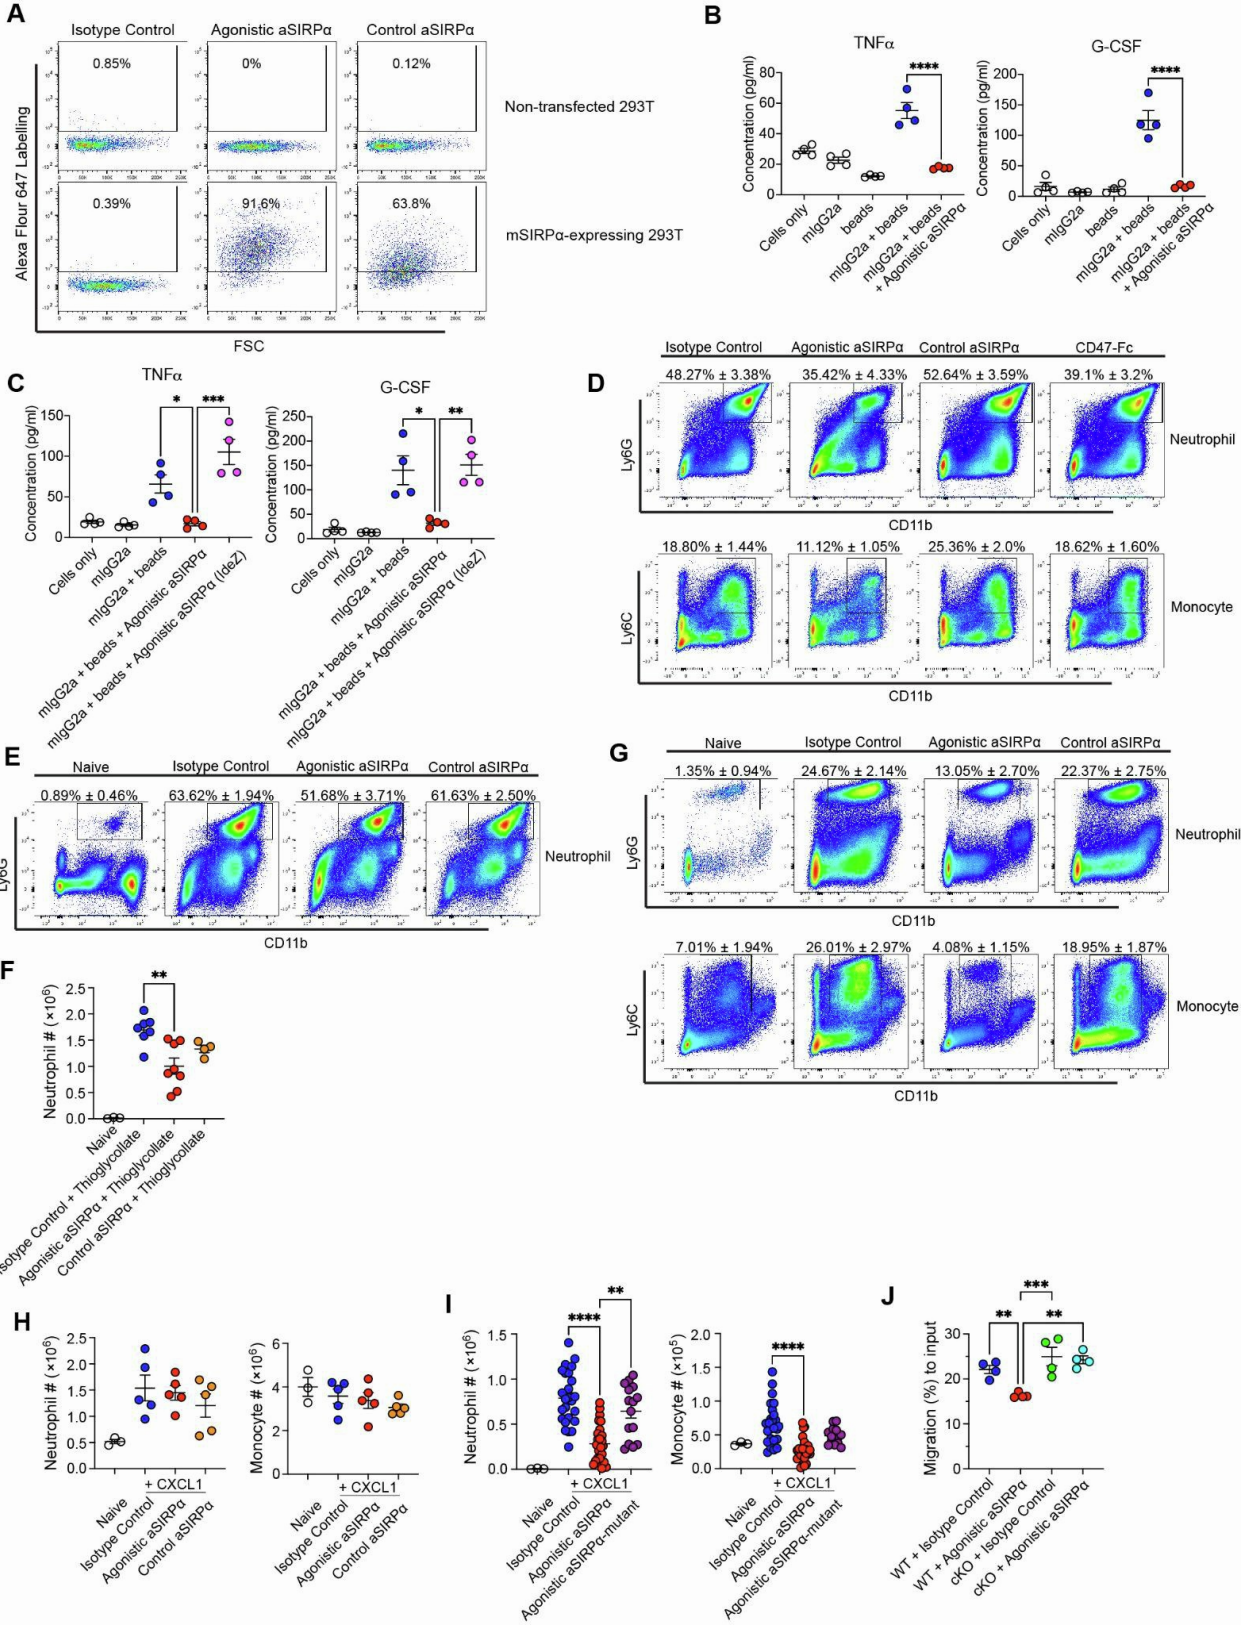

Figure S1 (related to Figure 2). Additional characterization of agonistic anti-Sirpα antibody and

**representative flow cytometric plots.**

(A) Representative dot plots of Alexa Fluor 647 labeled isotype control, the agonist anti-SIRP $\alpha$  and the control anti-SIRP $\alpha$  binding with SIRP $\alpha$ . The 293T cells were transfected with or without SIRP $\alpha$  before staining. (B, C) Production of inflammatory TNF $\alpha$  and G-CSF in the RAW 264.7 cell-mIgG2a-protein A beads immune complex system. Cells were treated with isotype control, Agonist aSIRP $\alpha$ , Control aSIRP $\alpha$ , or IdeZ protease pre-treated agonistic aSIRP $\alpha$  (C) at indicated concentration for one hour before protein A beads were added for another 24 hours' culture. Cell medium supernatants were collected for luminex assay for cytokine quantification. (D) Representative flow cytometric gating of neutrophils (Ly6G<sup>+</sup>GR1<sup>+</sup>) and monocytes (Ly6G<sup>-</sup>GR1<sup>+</sup>) from monoclonal antibody treated mice for Figure 2C. (E, F) Flow cytometric analysis of peritoneal neutrophils (gated Ly6G<sup>+</sup>CD11b<sup>+</sup>) from thioglycollate challenged mice. Representative dot plots (E) and average cell numbers (F) of neutrophils. (G) Representative dot plots of neutrophils (gated Ly6G<sup>+</sup>CD11b<sup>+</sup>) and monocytes (Ly6G<sup>-</sup>CD11b<sup>+</sup>) for Figure 2E. (H) Average neutrophil and monocyte cell numbers in spleen collected 4 hours after CXCL1 injection. (I) Average neutrophil and monocyte cell numbers in peritoneal cavity 4 hours after CXCL1 injection. Mice were treated with indicated antibodies 16hr before CXCL1 injection. (J) Quantification of transmigration assay with bone marrow neutrophils 4 hours after transmigration, migrating to 10 ng/ml CXCL1. Bone marrow cells were isolated from overnight Isotype control or agonistic aSIRP $\alpha$  treated WT or LysMCre<sup>+</sup>*Sirpa*<sup>Loxp/Loxp</sup> mice. Data are from one representative experiment of two independent experiments with at least three biological replicates per group. Each symbol represents one mouse. \*P < 0.05, \*\*P < 0.01, \*\*\*P < 0.001 and \*\*\*\*P < 0.0001, by Ordinary One Way ANOVA with Tukey's multiple comparisons test.

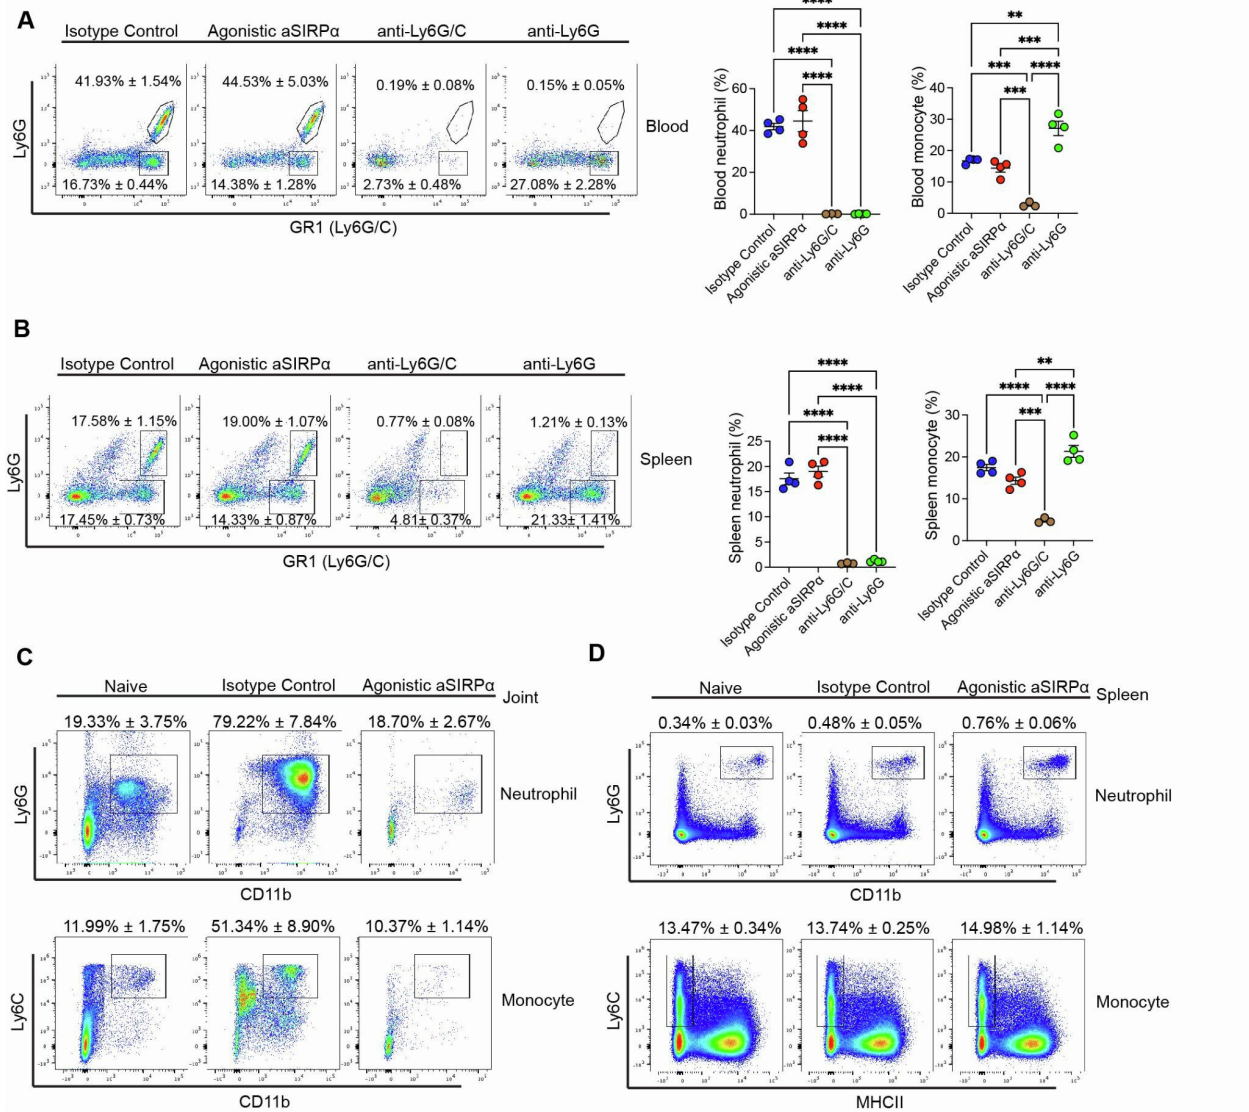

**Figure S2 (related to Figure 3) Representative flow cytometry plots of blood, spleen, and joint lymphocytes from KBxN arthritis mice.**

(A, B) Flow cytometric analysis of blood (A) and spleen (B) neutrophils (Ly6G<sup>+</sup>) (Ly6G/C is GR1) and monocytes (Ly6G<sup>+</sup>Ly6C<sup>+</sup>) from mice with indicated antibody treatment. Representative dot plots (left) and average cell percentages (right) of neutrophils and monocytes. (C) Representative dot plots of neutrophils (Ly6G<sup>+</sup>CD11b<sup>+</sup>) and monocytes (Ly6C<sup>+</sup>CD11b<sup>+</sup>) for Figure 4E. (D) Representative dot plots of spleen neutrophils (Ly6G<sup>+</sup>CD11b<sup>+</sup>) and monocytes (Ly6C<sup>+</sup>CD11b<sup>+</sup>MHCII<sup>+</sup>) for Figure 4F. Data for are from one representative experiment of two independent experiments with at least three technical replicates per group. Each symbol represents one mouse. \*P <

0.05, \*\*P < 0.01, \*\*\*P < 0.001 and \*\*\*\*P < 0.0001, by Ordinary One Way ANOVA with Tukey's multiple comparisons test.

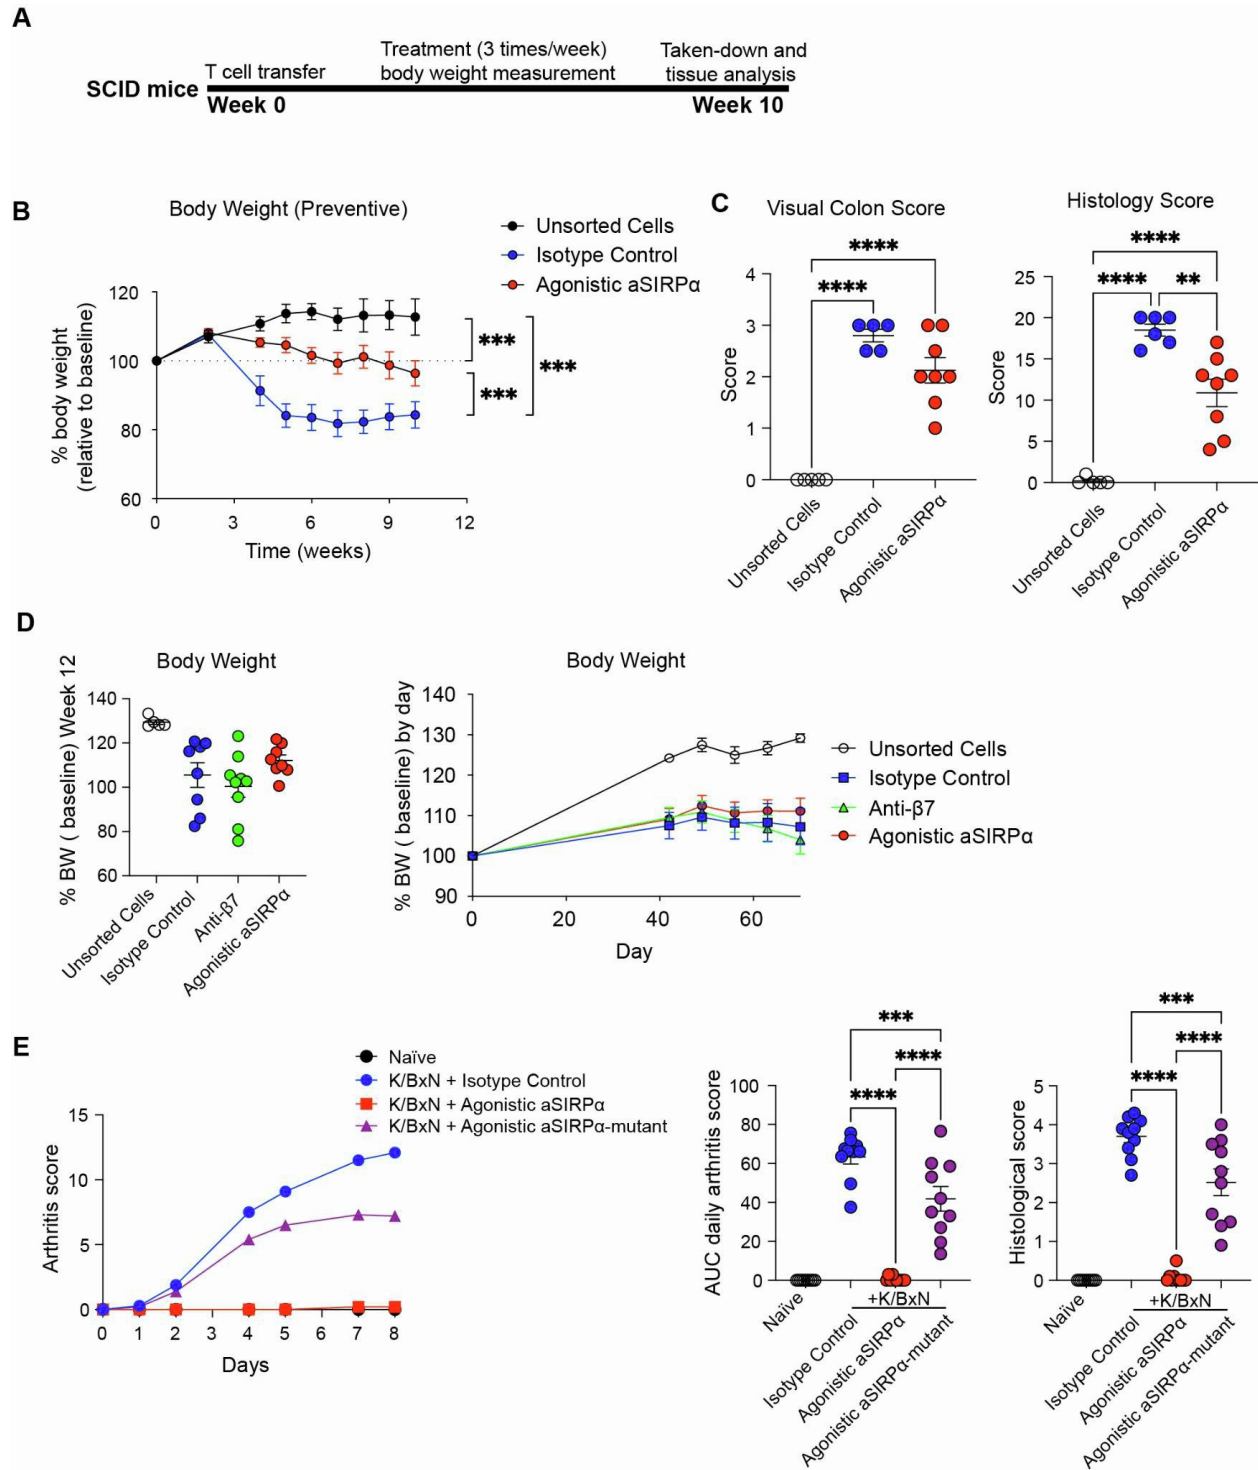

**Figure S3 (related to Figure 4 and discussion). Body weight from transfer colitis mice and reduced therapeutic efficacy in agonistic anti-Sirpα DANA mutant antibody.**

(A) Schema of the CD45RB<sup>high</sup>CD4<sup>+</sup> T cell transfer colitis preventive model. C.B17 SCID mice were transferred with unsorted or sorted CD45RB<sup>high</sup>CD4<sup>+</sup> T cells, and all mice were treated 3 times per week until the end of the



study. All mice were euthanized by Week 10. **(B, C)** Percentage of body weight to baseline of Week 0 in the CD45RB<sup>high</sup>CD4<sup>+</sup> T cell transfer colitis model. Visual colon scores and histological scores of colons. **(D)** In the therapeutic model of Figure 4A, mouse body weight was measured at the beginning as baseline and again measured at Week 12 at the end of the experiment. **(E)** Clinical arthritis scores and paw/joint histological scores of mice received various treatments and K/BxN serum transfer. Anti-Sirp $\alpha$  DANA mutant antibody carries amino acid mutations to abrogate Fc binding to Fc receptors. Data for are from one representative experiment of two independent experiments with at least three technical replicates per group. Each symbol represents one mouse. \*P < 0.05, \*\*P < 0.01, \*\*\*P < 0.001 and \*\*\*\*P < 0.0001, by Ordinary One Way ANOVA with Tukey's multiple comparisons test.

**Table S1 (related to Figure 1). Elevated SIRPA and neutrophil/monocyte associated genes in IBD biopsies.**

| Symbol | Crohn's Disease inflamed v uninfamed |            | Ulcerative Colitis inflamed v uninfamed |            |
|--------|--------------------------------------|------------|-----------------------------------------|------------|
|        | Log Fold Change                      | FDR        | Log Fold Change                         | FDR        |
| SIRPA  | 0.92525523                           | 1.93E-05   | 0.64693961                              | 8.82E-05   |
| CSF3   | 0.69977411                           | 0.00018332 | 0.6569778                               | 0.00089511 |
| CXCL8  | 1.50874913                           | 3.12E-06   | 1.53507407                              | 4.49E-05   |
| S100A8 | 2.46943274                           | 3.20E-06   | 2.67787325                              | 3.75E-05   |
| S100A9 | 1.45178803                           | 6.94E-06   | 1.63951405                              | 6.63E-05   |
| VNN2   | 0.96334373                           | 0.00204402 | 0.99420002                              | 0.00298004 |
| NCF2   | 1.13740821                           | 3.80E-05   | 0.97764397                              | 8.50E-05   |
| FCGR2A | 0.91239283                           | 9.15E-05   | 0.61994322                              | 0.00039825 |

Statistical analysis of transcriptional data of neutrophil/monocyte associated gene expression in inflamed and uninfamed UC/CD colonic biopsies. FDR is the false discovery rate. Mean fold change is represented in log format.

**Table S2 (related to Figure 1). Elevated SIRPA and neutrophil/monocyte associated genes in baseline colonic biopsies of patients who failed with Vedolizumab or Infliximab.**

| Gene   | Biologic Non-responder vs Responder at Baseline |         |       | Vedolizumab Non-responder vs Responder at Baseline |         |       | Infliximab Non-responder vs Responder at Baseline |         |       |
|--------|-------------------------------------------------|---------|-------|----------------------------------------------------|---------|-------|---------------------------------------------------|---------|-------|
|        | Log Fold Change                                 | P Value | FDR   | Log Fold Change                                    | P Value | FDR   | Log Fold Change                                   | P Value | FDR   |
| SIRPA  | 0.333                                           | 0.020   | 0.288 | 0.334                                              | 0.056   | 0.333 | 0.020                                             | 0.288   | 0.334 |
| S100A8 | 1.225                                           | 0.006   | 0.288 | 0.969                                              | 0.081   | 1.225 | 0.006                                             | 0.288   | 0.969 |
| S100A9 | 0.830                                           | 0.008   | 0.288 | 0.668                                              | 0.090   | 0.830 | 0.008                                             | 0.288   | 0.668 |
| VNN2   | 0.868                                           | 0.009   | 0.288 | 1.014                                              | 0.014   | 0.868 | 0.009                                             | 0.288   | 1.014 |
| CXCL8  | 1.044                                           | 0.006   | 0.288 | 1.006                                              | 0.053   | 1.044 | 0.006                                             | 0.288   | 1.006 |
| FCGR2A | 0.769                                           | 0.018   | 0.288 | 0.940                                              | 0.032   | 0.769 | 0.018                                             | 0.288   | 0.940 |
| NCF2   | 0.663                                           | 0.016   | 0.288 | 0.684                                              | 0.069   | 0.663 | 0.016                                             | 0.288   | 0.684 |
| CSF3   | 0.463                                           | 0.024   | 0.288 | 0.491                                              | 0.068   | 0.463 | 0.024                                             | 0.288   | 0.491 |
| NLRP3  | 0.603                                           | 0.004   | 0.288 | 0.663                                              | 0.045   | 0.603 | 0.004                                             | 0.288   | 0.663 |

Statistical analysis of transcriptional data of neutrophil/monocyte associated gene expression in baseline colonic biopsies of patients who responded or failed with Vedolizumab and Infliximab. FDR is the false discovery rate. Mean fold change is represented in log format.

**Table S3 (related to Figure 3). Agonistic anti-SIRP $\alpha$  treatment reduces inflammatory genes in joint tissues.**

| Gene   | Isotype Control vs Naïve Mice |       | Agonistic aSIRP $\alpha$ vs Isotype Control |       |
|--------|-------------------------------|-------|---------------------------------------------|-------|
|        | Log Fold Change               | FDR   | Log Fold Change                             | FDR   |
| Il1b   | 6.890                         | 0.013 | -5.164                                      | 0.054 |
| Il6    | 5.120                         | 0.009 | -4.052                                      | 0.032 |
| Ccl7   | 4.946                         | 0.007 | -2.810                                      | 0.011 |
| Ccl8   | 4.018                         | 0.012 | -3.432                                      | 0.008 |
| Ccl12  | NA                            | NA    | -2.082                                      | 0.048 |
| Cxcl1  | 4.860                         | 0.007 | -2.961                                      | 0.007 |
| Cxcl2  | 3.692                         | 0.005 | -3.292                                      | 0.018 |
| Cxcl3  | NA                            | NA    | -2.475                                      | 0.113 |
| Csf3   | NA                            | NA    | NA                                          | NA    |
| Csf3r  | 3.516                         | 0.012 | -2.201                                      | 0.035 |
| Fcgr2b | 2.079                         | 0.004 | -1.194                                      | 0.017 |
| Clec4d | 3.819                         | 0.002 | -3.265                                      | 0.005 |
| Clec4e | 3.780                         | 0.009 | -2.817                                      | 0.020 |
| Cd68   | 6.890                         | 0.013 | -5.164                                      | 0.054 |
| Cd80   | 5.120                         | 0.009 | -4.052                                      | 0.032 |
| Ncf2   | 4.946                         | 0.007 | -2.810                                      | 0.011 |
| Sirpa  | 4.018                         | 0.012 | -3.432                                      | 0.008 |

Statistical analysis of differential expression of genes related to myeloid cells and genes of cytokines and chemokines in naïve, Isotype control and Agonistic aSIRP $\alpha$  treated mice on Day7 after K/BxN serum transfer. FDR is the false discovery rate. Mean fold change is represented in log format.
